1 **The shapes of wine and table grape leaves: an ampelometric study inspired by the methods**  
2 **of Pierre Galet**

3  
4 Daniel H. Chitwood<sup>1,2,\*</sup>

5  
6 <sup>1</sup>Department of Horticulture, Michigan State University, East Lansing, MI 48824 USA

7 <sup>2</sup>Department of Computational Mathematics, Science & Engineering, East Lansing, MI 48824  
8 USA

9  
10 \*To whom correspondence should be addressed:

11  
12 Daniel H. Chitwood  
13 Michigan State University  
14 Dept. Horticulture  
15 1066 Bogue St.  
16 East Lansing, MI 48824 USA  
17 chitwoo9@msu.edu

18  
19  
20  
21  
22  
23  
24  
25  
26  
27  
28  
29  
30  
31  
32  
33  
34  
35  
36  
37  
38  
39  
40  
41  
42  
43  
44

## 45 **ABSTRACT**

46  
47 The shapes of grapevine leaves have been critical to correctly identify economically important  
48 varieties throughout history. The correspondence of homologous features in nearly all  
49 grapevine species and varieties has enabled advanced morphometric approaches to  
50 mathematically classify leaf shape. These approaches either model leaves through the  
51 measurement of numerous vein lengths and angles or measure a finite number of  
52 corresponding landmarks and use Procrustean approaches to superimpose points and perform  
53 statistical analyses. Hand illustrations, too, play an important role in grapevine identification, as  
54 details omitted using the above methods can be visualized. Here, I use a saturating number of  
55 pseudo-landmarks to capture intricate, local features in grapevine leaves: the curvature of veins  
56 and the shapes of serrations. Using these points, averaged leaf shapes for 60 varieties of wine  
57 and table grapes are calculated that preserve features. A pairwise Procrustes distance matrix of  
58 the overall morphological similarity of each variety to the other classifies leaves into two main  
59 groups—deeply lobed and more entire—that correspond to the measurements of sinus depth  
60 by Pierre Galet. Using the system of Galet, pseudo-landmarks are converted into relative  
61 distance and angle measurements. Both Galet-inspired and Procrustean methods allow  
62 increased accuracy in predicting variety compared to a finite number of landmarks. Using  
63 Procrustean pseudo-landmarks captures grapevine leaf shape at the same level of detail as  
64 drawings and provides a quantitative method to arrive at mean leaf shapes representing  
65 varieties that can be used within a predictive statistical framework.

## 66 67 **INTRODUCTION**

68  
69 The grapevine leaf is a coordinate system defined by vasculature, the branching points and  
70 termination of which can be found in nearly all *Vitis* spp. leaves. Each leaf has a midvein, two  
71 distal/superior veins, two proximal/inferior veins, and two prominent veins that branch off of  
72 the proximal veins called petiolar veins (**Fig. 1**). The major primary veins of the leaf terminate at  
73 the lobe tips. The secondary veins that branch off the primary terminate at the blade margin,  
74 forming serration patterns between consecutive branches. Using the ordered branching pattern  
75 that emerges from the primary veins defining each lobe, a hierarchy of venation and serrated  
76 teeth along the blade can be defined. This system permits spatial correspondence between all  
77 grapevine leaves that has enabled sophisticated morphometric approaches and historical  
78 application to the discrimination of species and varieties using leaf shape.

79  
80 In the mid-1850s, an aphid crossed the Atlantic from North America attacking the root system  
81 of *Vitis vinifera* (domesticated grape) vines in France decimating the wine industry. North  
82 American *Vitis* spp. rootstocks were resistant to the pest and ultimately the solution to the  
83 blight that restored wine production. The rootstocks were new to European viticulturists, yet  
84 correctly identifying and selecting the correct rootstock variety was vital. The roots themselves  
85 and the grape clusters were of little use to identifying varieties, so viticulturists turned to the  
86 leaves. The field of ampelography (“vine” + “writing”), concerning the discrimination of  
87 grapevine varieties, was born and chief among its techniques was ampelometry (“vine” +  
88 “process of measuring”), a method of measuring leaf shape. Hermann Goethe (Goethe, 1876;

89 1878) first proposed to use the angle of the petiolar sinus to identify North American *Vitis* spp.,  
90 but Louis Ravaz expanded upon the idea and established a foundational system for quantifying  
91 the shapes of grapevine leaves in his *Les vignes américaines: Porte-greffes et producteurs*  
92 *directs* (1902). A focus on not only the angle, but the shape and contour of the petiolar sinus in  
93 hand-drawings was made. The overall shape of the leaf (reniform, orbicular, cordiform,  
94 cuneiform, or truncate) was described in terms of ratios of lengths and angles between veins,  
95 and codified into discrete groups based on ranges of values. Even the serrations were described  
96 in terms of length-to-width ratio and convex/concave shapes.

97  
98 While Ravaz popularized the system of ampelometry, Pierre Galet turned it into an artform  
99 (Galet 1979; 1985; 1988; 1990; 2000). In his works, Galet hand draws a representative leaf for  
100 each variety, a format that guides the reader's eyes to the major veins and their relationship to  
101 the blade. Extensive information regarding the history, geography, and phenology of vines, and  
102 the appearance of the inflorescence and growing tip, in addition to descriptions of leaf  
103 hirsuteness, contour, and surface, verbally recreates the experience of encountering a vine in  
104 the reader's mind. Like Ravaz, Galet created a discretized system of values to describe ratios of  
105 vein lengths and angles (the Galet formula), but also created measuring devices (the Galet ruler  
106 and protractor) to easily quantify values in the vineyard and compare to ideal values for each  
107 variety that he published. Galet, through careful observation, a quantitative mindset, detailed  
108 description, encyclopedic knowledge, hand illustration, and an artist's eye effectively  
109 transcribed the immense phenotypic variation among *Vitis* spp. into books that have since  
110 inspired and taught those who work with and love grapevines.

111  
112 Others took the analysis of grapevine leaves in a more mathematical direction. The homologous  
113 coordinates in every *Vitis* spp. leaf allows even minor veins to be hierarchically accounted for.  
114 By counting teeth, where veins terminate, and measuring leaf shape, Acúrcio Rodrigues  
115 developed a method for calculating an average leaf shape (Rodrigues 1939; 1941a; 1941b;  
116 1952a; 1952b). María-Carmen Martínez developed the method further, and through statistically  
117 measuring numerous angles, lengths, and numbers of teeth for a variety, developed a model  
118 for reconstituting a visual representation of an average leaf (Martínez and Grenan, 1999). The  
119 method opened the door for statistical analysis of grapevine leaf morphology (Martinez et al.,  
120 1995), discriminating cultivars (Santiago et al., 2005; 2007; 2008; Gago et al., 2009a), clones  
121 (Martínez et al., 1997a; 1997b), and even comparing depictions of leaves in historical works of  
122 art to present-day varieties (Gago et al., 2009b; 2014).

123  
124 Another approach to measuring shape is landmarks (Booketein, 1997): homologous  $x$  and  $y$   
125 coordinates that are found in every leaf. Using Procrustean methods, landmarks can be  
126 superimposed through translation, rotation, scaling, and reflection minimizing the distance of  
127 all points to each other (Gower, 1975). Although landmarks capture less of the overall shape of  
128 an object, because they are finite, high levels of replication are possible. Tens of thousands of  
129 grapevine leaves have been measured using landmarks. Previous analysis of wine and table  
130 grape varieties in the USDA Wolfskill National Clonal Germplasm Repository in Winters,  
131 California (USA) used ten landmarks along the distal and proximal lobe tips and sinuses  
132 (excluding the petiolar veins) on both sides of the leaf to measure the genetic basis of leaf

133 shape (Chitwood et al., 2014). A set of 17 landmarks including the petiolar vein and the first  
134 major secondary branch points of the midvein, distal vein, and proximal vein on both sides of  
135 the leaf was used to explore leaf shape in a developmental and evolutionary context using *Vitis*  
136 spp. in the USDA Geneva, New York (USA) germplasm collection (Chitwood et al., 2016a), to  
137 find conserved loci regulating leaf shape in multiple *Vitis* spp. interspecific hybrid mapping  
138 families (Demmings et al., 2019), and to document inter- and intra-species leaf shape variation  
139 between *V. riparia* and *V. rupestris* clones at the Missouri Botanical Garden, St. Louis (USA;  
140 Klein et al., 2017). A set of 21 landmarks capturing the widths of the primary veins and their  
141 major secondary branching veins for half of the leaf was used to reanalyze the USDA Geneva,  
142 New York (USA) germplasm across two years on the same vines to test for climate-induced  
143 changes in leaf shape plasticity (Chitwood et al., 2016b).

144  
145 Although insightful and permitting the analysis of thousands of leaves, a finite number of  
146 landmarks fails to capture the curves, serrations, and intricate details of grapevine leaf shape  
147 that are readily apparent by eye. The analysis presented here attempts to capture these finer  
148 features of grapevine leaf shape by 1) maximizing the number of landmarks used and 2)  
149 capturing curves and local features (such as serrations) by using a saturating number of pseudo-  
150 landmarks between them.

151

## 152 **MATERIALS AND METHODS**

153

### 154 *Plant material and photography*

155

156 Over 9,500 leaves from more than 1,200 wine and table grape varieties (*Vitis vinifera*) were  
157 collected at the USDA Wolfskill National Clonal Germplasm Repository in Winters, California  
158 (USA) from May 28 through June 1, 2011. As previously described in Chitwood et al., 2014,  
159 photographs of the leaves were taken using a remote-controlled camera attached to a copy  
160 stand and placing the leaves under nonreflective glass to flatten them on top of a light box to  
161 highlight venation. A total of 4,950 photos were taken, named by vine location that serves as a  
162 key for variety identity. In the previous study, the shapes of all leaves were measured using ten  
163 landmarks. This study examines a small subset of 60 varieties in intensive detail that were also  
164 described by Pierre Galet in *A Practical Ampelography* (Galet, 1979; 1985). The original  
165 photographs used for this study can be found at

166 [https://github.com/DanChitwood/grapevine\\_ampelometry/tree/master/0\\_visual\\_check/ampelometry\\_images](https://github.com/DanChitwood/grapevine_ampelometry/tree/master/0_visual_check/ampelometry_images). Each photo is named by its vineyard location at the USDA Wolfskill repository

167 followed by letters if multiple images were taken for the sampled clones, which can be used to  
168 determine variety identity using the following key:

169 [https://github.com/DanChitwood/grapevine\\_ampelometry/blob/master/0\\_visual\\_check/ampelometry\\_id\\_key.txt](https://github.com/DanChitwood/grapevine_ampelometry/blob/master/0_visual_check/ampelometry_id_key.txt)

170

171  
172  
173 Only 60 varieties are analyzed in this study, but all of the >4,950 photos of 9,500 leaves of more  
174 than 1,200 wine and table grape varieties can be downloaded using the following doi at Dryad:

175 <https://doi.org/10.5061/dryad.g79cnp5mn>

176

177

178 *Landmarking, tracing, and visual checks*

179

180 24 landmarks corresponding to the tips of midvein, distal vein, and proximal vein (3 points), the  
181 distal and proximal sinuses (2 points), the petiolar junction (1 point), and the three major  
182 secondary branch points for the midvein, distal vein, and proximal vein (9 points) and their  
183 termination along the blade margin (9 points) were used. The landmarks form the framework  
184 for the rest of the points in the analysis, as they are homologous features found in every leaf.  
185 Landmarks are indicated as orange dots in **Fig. 1**. Between the landmarks, pseudo-landmarks  
186 were used to capture continuous curves, indicated in magenta in **Fig. 1**. The pseudo-landmarks  
187 were measured as a vector, an ordered set of spatial coordinate pixel values, with an origin and  
188 an end. The vectors are as follows:  $m$ , from the petiolar junction to the tip of the midvein;  $d$   
189 from the petiolar junction to the tip of the distal vein;  $p$  from the petiolar junction to the tip of  
190 the proximal vein;  $p1$  (the petiolar vein),  $d1$ , and  $m1$  from the first secondary branch point of  
191 their respective primary veins to the termination of the vein at the margin;  $p2$ ,  $d2$ , and  $m2$  from  
192 the second secondary branch point of their respective primary veins to the termination of the  
193 vein at the margin;  $p3$ ,  $d3$ , and  $m3$  from the third secondary branch point of their respective  
194 primary veins to the termination of the vein at the margin;  $pa$ ,  $da$ ,  $ma$  along the margin from  
195 the beginning of their respective lobe to the termination of  $p1$ ,  $d1$ , and  $m1$ , respectively;  $pb$ ,  $db$ ,  
196  $mb$  from the termination of  $pa$ ,  $da$ , and  $ma$ , respectively, to the termination of  $p2$ ,  $d2$ , and  $m2$ ,  
197 respectively;  $pc$ ,  $dc$ ,  $mc$  from the termination of  $pb$ ,  $db$ , and  $mb$ , respectively, to the termination  
198 of  $p3$ ,  $d3$ , and  $m3$ , respectively;  $pd$ ,  $dd$ ,  $md$  from the termination of  $pc$ ,  $dc$ , and  $mc$ , respectively,  
199 to the tips of the proximal, distal, and midveins, respectively;  $ps$  and  $ds$  from the tip of the  
200 proximal and distal veins, respectively, to the midpoint of the proximal and distal sinus,  
201 respectively. The vectors are visualized as arrows in **Fig. 1**.

202

203 Vectors were traced by hand in ImageJ using the segmented line tool with fitted splines  
204 (Abràmoff et al., 2004). The set of  $x$  and  $y$  coordinates for each vector were saved as individual  
205 tab-delimited .txt files named by 1) the photo ID of the leaf indicating the vineyard position of  
206 the vine it was collected from, 2) an enumerating value 1 through 4 specifying which of four  
207 leaves for the variety the data corresponds to, and 3) which vector the data file represents.

208 These files, the raw data, are available at the following link:

209 [https://github.com/DanChitwood/grapevine\\_ampelometry/tree/master/0\\_visual\\_check/ampelometry\\_data](https://github.com/DanChitwood/grapevine_ampelometry/tree/master/0_visual_check/ampelometry_data). Tracing all data for a single leaf took approximately 15 minutes. Because the data  
210 was traced by hand, it was important to visually verify its accuracy. Analyses in Python were  
211 undertaken using NumPy (Oliphant, 2006), pandas (McKinney, 2010), and Matplotlib (Hunter,  
212 2007) to plot the data on the actual photo. The code for plotting vectors onto the original photo  
213 can be found here:

214 [https://github.com/DanChitwood/grapevine\\_ampelometry/blob/master/0\\_visual\\_check/ampelometry\\_visual\\_check.ipynb](https://github.com/DanChitwood/grapevine_ampelometry/blob/master/0_visual_check/ampelometry_visual_check.ipynb). The visual checks for each of the 240 leaves analyzed in this study  
215 can be found here:

216 [https://github.com/DanChitwood/grapevine\\_ampelometry/tree/master/0\\_visual\\_check/output\\_visual\\_check](https://github.com/DanChitwood/grapevine_ampelometry/tree/master/0_visual_check/output_visual_check)

219  
220

## 221 *Interpolation and Procrustes analysis*

222  
223 Once data for all 240 leaves were collected, an appropriate number of points to interpolate for  
224 each vector was determined. Procrustes analysis requires corresponding points in every  
225 sample. For the 24 homologous landmarks, this condition is already met, but for the pseudo-  
226 landmarks, an equal number of equidistant points for each vector must be calculated. A  
227 function to retrieve the overall distance of a vector path was created using the `numpy.ediff1d`  
228 function (consecutive differences between elements of an array) to calculate Euclidean distance  
229 and the `numpy.cumsum` function (cumulative sum of an array) to calculate the cumulative  
230 distance. For each vector, its total sum distance across all leaves was calculated, as well as the  
231 overall distance for all vectors for all leaves. The total number of landmarks + pseudo-  
232 landmarks apportioned to a vector was based on its relative total distance. The total number of  
233 landmarks was chosen at 6,000. This was an arbitrary decision to select a number as high as  
234 possible so that pseudo-landmarks were saturating (creating continuous curves and capturing  
235 local details, such as serration shape) but still low enough that computationally intensive  
236 Procrustes analyses were feasible on a laptop computer. Due to rounding, the final number of  
237 landmarks was 5,999, assigned to vectors as follows:

238 [https://github.com/DanChitwood/grapevine\\_ampelometry/blob/master/1\\_interpolation/outp](https://github.com/DanChitwood/grapevine_ampelometry/blob/master/1_interpolation/output_number_of_points.txt)  
239 [ut\\_number\\_of\\_points.txt](https://github.com/DanChitwood/grapevine_ampelometry/blob/master/1_interpolation/output_number_of_points.txt). With assigned numbers of points to every vector, interpolation was  
240 used to calculate equidistant pseudo-landmarks. A function was created using the `scipy`  
241 (Virtanen et al., 2020) `interp1d` function to interpolate the correct number of equidistance  
242 points for each vector. The code used to interpolate points is here:  
243 [https://github.com/DanChitwood/grapevine\\_ampelometry/blob/master/1\\_interpolation/ampe](https://github.com/DanChitwood/grapevine_ampelometry/blob/master/1_interpolation/ampelometry_interpolation.ipynb)  
244 [lometry\\_interpolation.ipynb](https://github.com/DanChitwood/grapevine_ampelometry/blob/master/1_interpolation/ampelometry_interpolation.ipynb). The interpolated points can be found here:  
245 [https://github.com/DanChitwood/grapevine\\_ampelometry/blob/master/1\\_interpolation/outp](https://github.com/DanChitwood/grapevine_ampelometry/blob/master/1_interpolation/output_interpolated_points.txt)  
246 [ut\\_interpolated\\_points.txt](https://github.com/DanChitwood/grapevine_ampelometry/blob/master/1_interpolation/output_interpolated_points.txt)

247  
248 With corresponding points between all leaves, a Procrustes analysis could be performed.  
249 Generalized Procrustes Analysis (GPA) minimizes distances between corresponding points  
250 through translation, rotation, scaling, and reflection to an arbitrarily selected reference shape.  
251 The resulting mean shape for the superimposed points is calculated and becomes the new  
252 reference if the Procrustes distance to the reference does not meet a minimum threshold  
253 (Gower et al., 1975). GPA was performed using the `procGPA()` function from the package  
254 “`shapes`” (Dryden and Mardia, 2016) in R (R Core Team, 2019). GPA was first performed for the  
255 four leaves for each variety producing mean shapes and superimposed Procrustes coordinates.  
256 The Procrustes mean shape and coordinates were used for plotting. The `procdist()` function  
257 from “`shapes`” was used to calculate the Procrustes distance between each pair of mean shapes  
258 and the results saved as a pairwise distance matrix. The `hclust()` function in R using the  
259 “`mcquitty`” method was used to hierarchically cluster varieties based on the pairwise distance  
260 matrix and overall morphological similarity. The code for performing a Procrustes analysis for  
261 each variety and outputs can be found here:

262 [https://github.com/DanChitwood/grapevine\\_ampelometry/tree/master/2\\_procrustes by vari](https://github.com/DanChitwood/grapevine_ampelometry/tree/master/2_procrustes_by_variety)  
263 [ety](https://github.com/DanChitwood/grapevine_ampelometry/tree/master/2_procrustes_by_variety)

264

265 A GPA was also performed for all 240 leaves. The outputs include an overall Procrustes mean  
266 shape, super-imposed Procrustes coordinates for all leaves, and eigenvalues and eigenleaves  
267 from a PCA. The superimposed Procrustes coordinates of all leaves and the mean shape were  
268 plotted together. The code for the Procrustes analysis for all 240 leaves and the outputs can be  
269 found here:

270 [https://github.com/DanChitwood/grapevine\\_ampelometry/tree/master/3\\_overall\\_procrustes](https://github.com/DanChitwood/grapevine_ampelometry/tree/master/3_overall_procrustes)

271

272 *Data analysis*

273

274 To calculate allometry for each line segment, distances between all points were converted to  
275 cm using the pixel to cm scale measured for each leaf. The `lm()` function in R was used to model  
276 the natural log of the distance from each point to the next as a function of the natural log of the  
277 overall distance for each leaf. The slopes and residuals were saved. Slope values for each point  
278 were projected onto the Procrustes mean leaf and visualized using `ggplot2` (Wickham, 2016).  
279 The standard deviation of the residuals for each point was also calculated and plotted onto the  
280 mean leaf.

281

282 To calculate the statistical contribution of each landmark to discriminating leaves by variety, the  
283 Euclidean distance of each point to the corresponding point of the mean leaf was calculated.  
284 The distance of each point to the mean was then modeled as a function of variety using the  
285 `kruskal.test()` function. The test statistic and p-value were saved. The p-value was multiple test  
286 adjusted using the Benjamini-Hochberg method and plotted on the mean leaf.

287

288 To predict variety from leaf shape, datasets were first converted into orthogonal components  
289 using Principal Component Analysis (PCA) with the `prcomp()` function in R. Transformation into  
290 orthogonal variables was a necessity before proceeding with Linear Discriminant Analysis (LDA)  
291 to avoid collinearity (a problem with the saturating number of pseudo-landmarks with similar  
292 values used in this study). LDA was performed using the `lda()` function with the “MASS” package  
293 (Venables and Ripley, 2002). The cross-validated “leave-one-out” approach was used to predict  
294 the variety of each leaf using `CV = TRUE`. The `confusionMatrix()` function from the package  
295 “caret” (Kuhn, 2008) was used to calculate overall classifier statistics and estimates of accuracy  
296 from the resulting LDA model.

297

## 298 **RESULTS**

299

300 *Morphological similarity, comparison to the results of Pierre Galet, and average leaf shapes*

301

302 Using the pairwise Procrustes distance matrix of the overall morphological similarity of the  
303 average leaf of every variety to the other, a hierarchical clustering was performed to find  
304 groups of varieties with similar leaf shapes (**Fig. 2**). Because the clustering reflects the  
305 minimization of the distance of 5,999 points for each variety to the other, it is difficult to  
306 interpret which features of the leaf most strongly contribute to a leaf resembling another. To  
307 help understand which shape attributes of the leaf contributed to the clustering signal, the  
308 measurements of Pierre Galet for each variety were analyzed. The 60 varieties chosen for this

309 study are included in Galet's *A Practical Ampelography* (Galet, 1979; 1985). Each variety has  
310 values for the "Galet formula", a method that measures the relative lengths of veins and their  
311 angles (**Fig. 1**). The values A, B, and C measure the relative ratio of the lengths of L2, L3, and L4,  
312 respectively, to the L1. The variable  $r$  is the ratio of length to width.  $S'$  and  $S$  are angles between  
313 the L1 and the L3 and L4, respectively.  $S_u$  and  $I_n$  are the ratios of distances from the petiolar  
314 junction (0) to the superior and inferior sinuses, respectively, divided by the length of the L2  
315 and L3, respectively. Ratios and angles are discretized into values 0-9 and can be measured  
316 using the Galet ruler and the Galet protractor. For ratios of primary veins A, B, and C, increasing  
317 values correspond to decreasing ratios. For length-to-width ratio  $r$ , increasing values  
318 correspond to increasing ratios. For angles  $S'$  and  $S$  increasing values correspond to increasing  
319 angles, and for measures of sinus depth  $S_u$  and  $I_n$ , increasing values correspond to deeper  
320 sinuses. Comparing Galet formula values to hierarchical clustering, the overwhelming  
321 correspondence between the two datasets is sinus depth ( $S_u$  and  $I_n$ ; **Fig. 2**). Excluding uniquely  
322 shaped varieties that cluster alone (Chasselas cioutat, Zinfandel/Primitivo, Gewürtztraminer,  
323 and Burger/Monbadon), two major groups of varieties arise. Group I leaves are deeply lobed  
324 and Group II leaves slightly lobed or entire.

325  
326 One of the most impactful features of *A Practical Ampelography* (Galet, 1979; 1985) is Galet's  
327 drawings. For each variety, Galet drew a representative leaf. While the Galet formula provided  
328 a means to quantify shape, the drawings capture the totality of information embedded in leaf  
329 shapes that we so easily take in with our eyes but defies measurement. The relationship of all  
330 angles comprising a leaf together, the curves of the primary and secondary veins, the shapes of  
331 the serrations, the shape of the petiolar sinus, and the overlap of lobes: these are features that  
332 impact the values of the Galet formula but are not fully captured by it. The drawings of Galet  
333 highlight the ampelographic features used to quantify grapevine leaves: namely, the veins and  
334 their relationship to the blade. By analyzing a saturating number of pseudo-landmarks, these  
335 intricate features of grapevine leaves have been quantitatively captured. To create a statistical  
336 version of Galet's drawings, the 5,999 coordinate values for the four leaves for each variety  
337 were superimposed and the average leaf calculated. **Figs. 3-5** show the superimposed  
338 Procrustes coordinates for the four leaves for each variety (left), the average leaf (middle), and  
339 one example leaf with its coordinates overlaid. Such visualization combines the best attributes  
340 of landmark-based analyses and hand drawings: the calculation of an average leaf and the  
341 visualization of variance using superimposed Procrustes coordinates adds statistical rigor that  
342 drawings lack, while the use of a saturating number of pseudo-landmarks captures the  
343 continuous curves of veins and blade that a finite number of landmarks cannot. Leaves in **Figs.**  
344 **3-5** are displayed in the order of their clustering in **Fig. 2**. At a glance, the deep lobing of Group I  
345 leaves in **Fig. 3** and **Fig. 4** can be compared to the more entire Group II leaves in **Fig. 5**.

346  
347 *Allometry and the ability of each coordinate to discriminate varieties*

348  
349 In order to analyze the contributions of individual coordinates to global features of the leaf and  
350 variability among varieties, a Generalized Procrustes Analysis (GPA) was calculated for all 240  
351 leaves. All superimposed coordinates were overlaid on the overall average leaf (**Fig. 6A**). The  
352 mean leaf was subsequently used to project attributes of individual coordinates. Allometry (the



353 differential growth of features in relation to organ size) was analyzed for each landmark.  
354 Previously, we demonstrated strongly linear relationships between the natural log of primary  
355 vein area vs. the natural log of blade area: smaller leaves have a higher vein-to-blade area ratio  
356 than larger leaves (Chitwood et al., 2016b). To determine the allometric relationships for the  
357 coordinates used in this study, the natural log of the Euclidean distance of each point to the  
358 next was regressed against the overall Euclidean distance of all veins and blades. The slope for  
359 each coordinate was recorded and plotted on the mean leaf (**Fig. 6B**). The distal/superior sinus  
360 had the largest slope values, demonstrating that relative to other segments of the leaf, the  
361 invagination of this region in deeply lobed varieties takes up a larger proportion of the overall  
362 leaf. The proximal side of the proximal/inferior sinus also has relatively high slope values.  
363 Although slight, for the mid and distal lobes, the slope is less at the tip and increases  
364 incrementally along the blade towards the base. This is consistent with the distal regions of the  
365 leaf and lobes initiating and developing before the proximal regions (Jones et al., 2013). To  
366 determine if there was a relationship between higher slope values and variability, the standard  
367 deviation of the residuals of the allometric regression were projected onto the mean leaf (**Fig.**  
368 **6C**). Again, the distal/superior sinus and the proximal side of the proximal/inferior sinus had the  
369 highest variability. Together, the results show that the invagination of the sinuses, especially  
370 the distal/superior sinus, across varieties is the most malleable part of the grapevine leaf  
371 contributing to variation in leaf shape.

372  
373 To determine the ability of different coordinates to discriminate varieties, a Kruskal-Wallis test  
374 was used. The Euclidean distance of each coordinate to the mean leaf was calculated and  
375 modeled as a function of variety. If the replicated leaves of one or more varieties consistently  
376 varies from the mean leaf, the Kruskal-Wallis test statistic will be responsive. After multiple test  
377 adjustment, coordinates in the distal/superior sinus were found to be the most significant,  
378 especially the points in the middle of the sinus pocket (**Fig. 6D**). The proximal/inferior sinus did  
379 not show similar variation between varieties, demonstrating that a strong allometric  
380 relationship (**Fig. 6B**) is not necessarily indicative of variability. The mid lobe showed the least  
381 significant variation between varieties. Not only is the distal sinus an allometrically sensitive  
382 region of the leaf, but it is one of the strongest indicators of variety, consistent with the depth  
383 of sinus lobing differentiating the two main morphological groupings of grapevine leaves (**Fig.**  
384 **2**).

385  
386 *Comparing the ability of different morphometric methods to predict variety*

387  
388 The morphometric methods presented so far rely on two embedded features: 24 homologous  
389 landmarks found in every grapevine leaf, and a set of 5,999 equidistant pseudo-landmarks that  
390 capture finer features, such as curves and serrations. Pierre Galet proposed a separate method  
391 of quantification, focusing on the ratios of lengths of lobes and relative angles between them  
392 (**Fig. 1**). He even published idealized values for each variety (**Fig. 2**) that could be compared with  
393 real world measurements by viticulturists using the Galet ruler and protractor. Without  
394 replication, there is no way to compare the methods of Galet to other morphometric  
395 techniques. In order to approximate the focus of Galet's methodology on length ratios and  
396 angles, while preserving the continuous measurement of local features (such as curves and

397 serrations) enabled by using a saturating number of landmarks, a ratio/angular transformation  
398 of the data was developed. For each coordinate 1) the ratio of its distance from the petiolar  
399 junction divided by the length of the midvein and 2) its angle from the midvein was calculated.  
400 Plotting the ratio of the distance from the petiolar junction against angle, features of the leaf  
401 are still apparent (**Fig. 6E**). The mid lobe, as the point of comparison, lacks variability. But the  
402 farther from the mid lobe points lie, the more variation is observed. This is in part because of  
403 variation in the primary vein angles, which was a focus of the methodology of Galet and Ravaz.  
404 The petiolar vein, in particular, shows a large amount of angular variation relative to the  
405 midvein, verifying the longterm focus of ampelographers on the petiolar sinus as a source of  
406 identifying information between varieties.

407  
408 With replication for three different methods (only the 24 landmarks, the Galet-inspired  
409 transformation to ratios and angles, and all 5,999 Procrustes-adjusted coordinates) the ability  
410 to predict variety from shape information can be compared. A Principal Component Analysis  
411 (PCA) was performed on all three datasets to reduce information into orthogonal components.  
412 This step was necessary to avoid the collinearity of points that are, by definition, colinear. A  
413 Linear Discriminant Analysis (LDA) was performed on increasing number of PCs using a cross-  
414 validated approach and the overall accuracy recorded. Each method peaked in accuracy and  
415 then diminished (**Fig. 6F**). For the only landmark method the peak in accuracy was at 27 PCs, for  
416 the Galet-inspired method 42 PCs, and for the all Procrustes coordinate method at 54 PCs. The  
417 amount of variation in the higher number PCs is miniscule (**Fig. 6G**) yet still contributed to  
418 increases in model accuracy. This demonstrates that especially for the Galet-inspired and all  
419 Procrustes methods, that fine details captured by higher order PCs still contain relevant  
420 information to discriminate between varieties. Plotting out the prediction from each dataset as  
421 a confusion matrix, especially for the only landmark dataset with lower accuracy, leaves tend to  
422 be most often confused within Groups I and II (**Fig. 7A**). The increased accuracy of the Galet and  
423 all Procrustes methods is expected given the increased amount of information that is captured  
424 using a saturating number of pseudo-landmarks (**Fig. 7B-C**). The overall accuracy of the only  
425 landmarks method was estimated at 0.454 (95% confidence interval 0.390 to 0.519, p-value =  
426  $5.70 \times 10^{-125}$ ), whereas the accuracy of the Galet method at 0.579 (95% confidence interval  
427 0.514 to 0.642, p-value =  $5.72 \times 10^{-179}$ ) and the all Procrustes method at 0.629 (95% confidence  
428 interval 0.565 to 0.690, p-value =  $2.04 \times 10^{-202}$ ) shows that saturating numbers of landmarks—  
429 regardless of method—contributes to increased accuracy in predicting variety.

## 430 431 **DISCUSSION**

432  
433 Leaf shape has historical importance in grapevines. Had genotyping existed in the late 1800s,  
434 new rootstock varieties to combat phylloxera in Europe and the North American *Vitis* spp.  
435 parents from which they are derived would have been identified molecularly. However,  
436 molecular biology did not exist yet. To verify rootstock identity and enforce appellation laws,  
437 the earliest of ampelographers, Goethe and Ravaz, turned to the angles and shapes of the  
438 petiolar sinus. Before the concept had existed, a relationship between genotype and  
439 phenotype, based on leaf morphology, was used to enforce law and regulate trade. Pierre Galet  
440 took the concept further, extending a framework for measuring the ratios of vein length and

441 their angles to capture overall leaf morphology, as well as cataloging shape through hand-  
442 drawings, allowing readers to appreciate the beauty of grapevine leaf diversity and its  
443 constituent features at a glance. María-Carmen Martínez examined the features of leaves in  
444 even greater detail, allowing averaged leaves to be reconstructed at the level of individual teeth  
445 along the margins and providing inspiration for landmark-based methods. Using landmarks,  
446 genetic, developmental, and environmental effects on leaf shape have been measured. Yet, the  
447 high replication that a limited number of landmarks permits misses the exquisite features of  
448 veins and blade, while drawing-based methods that holistically capture the leaf have until this  
449 point been difficult to quantify.

450  
451 Using a saturating number of pseudo-landmarks that capture continuous curves and intricate  
452 local features, powerful Procrustean-based methods can be used to measure leaf shape at a  
453 global level. A pairwise Procrustes distance matrix clusters leaves into two major categories:  
454 deeply lobed and more entire (**Fig. 2**). These categories correspond to Pierre Galet's  
455 measurements of sinus depth, showing that this feature especially is diagnostic of variety, even  
456 when varieties are measured on different continents and decades later. Calculating the  
457 Procrustean mean shape is a way to summarize drawings quantifying underlying replication,  
458 preserving local and global features to represent the ideal leaf for each variety without having  
459 to pick any particular individual one as an example (**Figs. 3-5**). The distal/superior sinus  
460 contributes disproportionately to the variation in leaf shape that discriminates varieties, both  
461 through allometry and the conspicuous placement of the distal/superior sinus pocket (**Fig. 6A-**  
462 **D**). The focus of Galet on the ratios of vein lengths and relative angles can be used to transform  
463 continuous coordinates while preserving the overall morphology of leaves (**Fig. 6E**). Both the  
464 Galet-inspired transformation to ratios and angles and using all Procrustes-adjusted  
465 coordinates gives comparable overall accuracies of 0.579 and 0.629, respectively (**Fig. 6F-G, Fig.**  
466 **7**). The much lower accuracy using only the 24 landmarks of 0.454 shows that the use of  
467 saturating pseudolandmarks (and less the framework within which they are analyzed) leads to  
468 higher prediction rates through capturing intricate features of the leaf. Using Procrustean  
469 pseudo-landmarks quantifies grapevine leaf shape to the same level of detail as drawings and  
470 provides a quantitative method to arrive at mean leaf shapes representing varieties that can be  
471 used within a predictive statistical framework.

472

## 473 **ACKNOWLEDGEMENTS**

474

475 The author is forever grateful to Pierre Galet (1921 - 2019), whose work and vision has provided  
476 boundless scientific and artistic inspiration.

477

## 478 **FUNDING**

479

480 This project was supported by the USDA National Institute of Food and Agriculture, and by  
481 Michigan State University AgBioResearch. The author was supported by the National Science  
482 Foundation Plant Genome Research Program award number 1546869.

483

## 484 **REFERENCES**

485  
486 Abràmoff MD, Magalhães PJ, Ram SJ. 2004. Image processing with ImageJ. *Biophotonics*  
487 *International* 11: 36-42.  
488  
489 Bookstein, FL. 1997. *Morphometric tools for landmark data: geometry and biology*. Cambridge,  
490 UK: Cambridge University Press.  
491  
492 Chitwood DH, Ranjan A, Martinez CC, Headland LR, Thiem T, Kumar R, Covington MF, Hatcher T,  
493 Naylor DT, Zimmerman S et al. 2014. A modern ampelography: a genetic basis for leaf shape  
494 and venation patterning in grape. *Plant Physiology* 164: 259-272.  
495  
496 Chitwood DH, Klein LL, O'Hanlon R, Chacko S, Greg M, Kitchen C, Miller AJ, Londo JP. 2016a.  
497 Latent developmental and evolutionary shapes embedded within the grapevine leaf. *New*  
498 *Phytologist* 210: 343-355.  
499  
500 Chitwood DH, Rundell SM, Li DY, Woodford QL, Tommy TY, Lopez JR, Greenblatt D, Kang J,  
501 Londo JP. 2016b. Climate and developmental plasticity: interannual variability in grapevine leaf  
502 morphology. *Plant Physiology* 170: 1480-1491.  
503  
504 Demmings EM, Williams BR, Lee CR, Barba P, Yang S, Hwang CF, Resich BI, Chitwood DH, Londo  
505 JP. 2019. Quantitative Trait Locus Analysis of Leaf Morphology Indicates Conserved Shape Loci  
506 in Grapevine. *Frontiers in Plant Science* 10: 1373.  
507  
508 Dryden IL, Mardia KV. 2016. *Statistical shape analysis: with applications in R* (Vol. 995).  
509 Hoboken, New Jersey, USA: John Wiley & Sons.  
510  
511 Gago P, Santiago JL, Boso S, Alonso-Villaverde V, Grando MS, Martínez MC. 2009a. Biodiversity  
512 and characterization of twenty-two *Vitis vinifera* L. cultivars in the Northwestern Iberian  
513 Peninsula. *American Journal of Enology and Viticulture*, 60(3): 293-301.  
514  
515 Gago P, Santiago JL, Boso S, Alonso-Villaverde V, Martinez MC. 2009b. Grapevine (*Vitis vinifera*  
516 L.): Old varieties are reflected in works of art. *Economic Botany*, 63(1): 67-77.  
517  
518 Gago P, Boso S, Alonso-Villaverde V, Santiago JL, Martínez MC. 2014. Works of Art and Crop  
519 History: Grapevine Varieties and the Baroque Altarpieces. *Economic Botany*, 68(2): 153-168.  
520  
521 Galet P. 1979. *A Practical Ampelography* (L.T. Morton, Trans.). Ithaca, USA: Cornell University  
522 Press.  
523  
524 Galet P. 1985. *Précis d'ampélographie pratique*, 5 ed., Montpellier, France: Déhan.  
525  
526 Galet P. 1988. *Cépages et vignobles de France*, vol. I, *Les vignes américaines*. Montpellier,  
527 France: Déhan.  
528

- 529 Galet P. 1990. *Cépages et vignobles de France*, vol. II. *L'ampélographie française*. Montpellier,  
530 France: Déhan.
- 531
- 532 Galet P. 2000. *Dictionnaire encyclopédique des cépages*. Paris, France: Hachette.
- 533
- 534 Goethe H. 1876. *Note sur l'ampelographie*. Congress of Marburg, September 18.
- 535
- 536 Goethe H. 1878. *Handbuch der Ampelographie*. Austria, Graz: Commission-Verlag von Leykam-  
537 Josefthal.
- 538
- 539 Gower JC. 1975. Generalized Procrustes Analysis. *Psychometrika* 40: 33-51.
- 540
- 541 Hunter JD. 2007. Matplotlib: A 2D graphics environment. *Computing in Science & Engineering* 9:  
542 90-95.
- 543
- 544 Jones, AW, Doughan, BG, Gerrath, JM, Kang, J. 2013. Development of leaf shape in two North  
545 American native species of *Ampelopsis* (Vitaceae). *Botany* 91: 857-865.
- 546
- 547 Klein LL, Caito M, Chapnick C, Kitchen C, O'Hanlon R, Chitwood DH, Miller AJ. 2017. Digital  
548 morphometrics of two North American grapevines (*Vitis*: Vitaceae) quantifies leaf variation  
549 between species, within species, and among individuals. *Frontiers in Plant Science* 8: 373.
- 550
- 551 Kuhn, M. 2008. Caret package. *Journal of Statistical Software* 28(5): 1-26.
- 552
- 553 Martínez MC, Loureiro MD, Mantilla JLG. 1995. Importancia y validez de distintos parámetros  
554 ampelométricos de hoja adulta para la diferenciación de cepas de *Vitis vinifera* L., de distintos  
555 cultivares. *Invest. Agr. Prod. Prot. Veg.* 9: 377-389.
- 556
- 556 Martínez MC, Boursiquot JM, Grenan S, Boidron R. 1997a. Étude ampelométrique de feuilles  
557 adultes de somaclones du cv. Grenache N (*Vitis vinifera* L.). *Can. J. Bot.* 75: 333-345.
- 558
- 559 Martínez MC, Grenan S, Boursiquot JM. 1997b. Variabilidad de algunos caracteres  
560 ampelográficos y de producción, en somaclones del cultivar Grenache N (*Vitis vinifera* L.). *Acta*  
561 *Hortic.* 18: 271-280.
- 562
- 563 Martinez MC, Grenan S. 1999. A graphic reconstruction method of an average vine leaf.  
564 *Agronomie, EDP Sciences* 19(6): 491-507
- 565
- 566 McKinney W. 2010. Data structures for statistical computing in python. In *Proceedings of the*  
567 *9th Python in Science Conference*. Vol. 445, pp. 51-56.
- 568
- 569 Oliphant TE. 2006. *A guide to NumPy* (Vol. 1, p. 85). USA: Trelgol Publishing.
- 570

- 571 R Core Team. 2019. R: A language and environment for statistical computing. R Foundation for  
572 Statistical Computing, Vienna, Austria. Website: <https://www.R-project.org/> [accessed 16 April  
573 2020]  
574
- 575 Ravaz L. 1902. *Les vignes américaines: Porte-greffes et producteurs directs*. Goulet, Montpellier  
576 and Paris. Digitized by Google Books from Cornell University.  
577
- 578 Rodrigues A. 1939. Sobre a caracterização das espécies e híbridos do género *Vitis*. *Agron.*  
579 *Lusitana*, 1: 315-326.  
580
- 581 Rodrigues A. 1941a. Variações do recorte da folha da videira. *Agron. Lusitana* 3: 189-193.  
582
- 583 Rodrigues A. 1941b. Acêrca do valor taxonomico do numero de dentes da folha na separação  
584 de dois híbridos do genero *Vitis* L.. *Agron. Lusitana* 3:325-340.  
585
- 586 Rodrigues A. 1952a. O polimorfismo foliar e os estudos de filometria. Aplicação prática de um  
587 método ampelometrico. *Agron. Lusitana* 4: 339-359.  
588
- 589 Rodrigues A. 1952b. Um metodo filométrico de caracterização. *Fundamentos. Descrição-*  
590 *Técnica Operatôria, Serviço editorial da repartição de estudos, informação e propaganda.*  
591 Lisboa, Portugal.  
592
- 593 Santiago JL, Boso S, Martín JP, Ortiz JM, Martínez MC. 2005. Characterization and identification  
594 of grapevine cultivars (*Vitis vinifera* L.) from northwestern Spain using microsatellite markers  
595 and ampelometric methods. *Vitis* 44(2): 67-72.  
596
- 597 Santiago JL, Boso S, Gago P, Alonso-Villaverde V, Martínez MC. 2007. Molecular and  
598 ampelographic characterisation of *Vitis vinifera* L." Albariño", " Savagnin Blanc" and " Caíño  
599 Blanco" shows that they are different cultivars. *Spanish Journal of Agricultural Research* 5(3):  
600 333-340.  
601
- 602 Santiago JL, González I, Gago P, Alonso-Villaverde V, Boso S, Martínez MC. 2008. Identification  
603 of and relationships among a number of teinturier grapevines that expanded across Europe in  
604 the early 20th century. *Australian journal of grape and wine research* 14(3): 223-229.
- 605 Venables WN, Ripley BD. 2002. *Modern Applied Statistics with S*, Fourth edition. Springer, New  
606 York. ISBN 0-387-95457-0, <http://www.stats.ox.ac.uk/pub/MASS4>.
- 607 Virtanen P, Gommers R, Oliphant TE, Haberland M, Reddy T, Cournapeau D, et al. 2020. SciPy  
608 1.0: fundamental algorithms for scientific computing in Python. *Nature Methods*, 17(3): 261-  
609 272.  
610
- 611 Wickham H. 2016. *ggplot2: elegant graphics for data analysis*. Berlin, Germany: Springer.  
612

613 **FIGURE LEGENDS**

614

615 **Figure 1: The Galet formula and Procrustean methods.** A scan of a Zinfandel leaf over which  
616 raw data has been plotted. Data is saved as image pixel coordinates. On the right side of the  
617 leaf landmarks (orange dots) and pseudo-landmarks (magenta lines) are plotted. Landmark data  
618 are saved as vectors, the names of which are indicated next to corresponding arrows. “p”, “d”,  
619 and “m” refer to “proximal”, “distal”, and “midvein” regions of the leaf. Along the blade, the  
620 base of each arrow and its tip indicate the beginning and end of a vector. Arrows arising from  
621 the tips of veins indicate the direction of vein vectors that originate at corresponding branch  
622 points within the leaf and terminate at the tips. On the left side of the leaf, the nomenclature of  
623 Galet is provided. Midvein, distal/superior, proximal/inferior, and petiolar veins are called L1,  
624 L2, L3, and L4, respectively. Superior and inferior sinuses are shown, as well as angles  $S'$  and  $S$   
625 between L1/L3 and L1/L4, respectively. A, B, and C are ratios of the lengths of L2, L3, and L4,  
626 respectively, to L1;  $r$  is the ratio of length to width; and  $S_u$  and  $I_n$  are the distances to the  
627 petiolar junction (0) of the superior ( $S_u$ ) and inferior ( $I_n$ ) sinuses divided by the length of the L2  
628 and L3, respectively.

629

630 **Figure 2: Clustering based on Procrustes distances and a comparison to Galet formula values.**  
631 Hierarchical clustering based on a pairwise Procrustes distance matrix of the overall  
632 morphological similarity of averaged leaves for each variety is shown on the left. On the right,  
633 Galet formula values (colored from light to dark for low to high values) for A, B, C,  $r$ ,  $S'$ ,  $S$ ,  $S_u$ ,  
634 and  $I_n$ , as defined in **Fig. 1**, are shown. Two Groups (I and II) with deep and slight lobing,  
635 respectively, are indicated.

636

637 **Figure 3: Leaf shapes by variety.** Four leaves for each variety with superimposed Procrustes  
638 coordinates (left, gray), the mean leaf (middle, magenta and orange), and one example leaf  
639 overlaid with coordinates (right) are shown. Leaves are in the same order as presented in the  
640 hierarchical clustering in **Fig. 2**.

641

642 **Figure 4: Leaf shapes by variety.** Four leaves for each variety with superimposed Procrustes  
643 coordinates (left, gray), the mean leaf (middle, magenta and orange), and one example leaf  
644 overlaid with coordinates (right) are shown. Leaves are in the same order as presented in the  
645 hierarchical clustering in **Fig. 2**, continued from **Fig. 3**.

646

647 **Figure 5: Leaf shapes by variety.** Four leaves for each variety with superimposed Procrustes  
648 coordinates (left, gray), the mean leaf (middle, magenta and orange), and one example leaf  
649 overlaid with coordinates (right) are shown. Leaves are in the same order as presented in the  
650 hierarchical clustering in **Fig. 2**, continued from **Fig. 4**.

651

652 **Figure 6: Allometry and variability between varieties and their prediction. A)** Superimposed  
653 Procrustes coordinates for all leaves (gray) and overall mean leaf (magenta and orange). **B)**  
654 Allometric values for each coordinate projected onto the mean Procrustes leaf. Points are  
655 colored by slope of a fitted line for the natural log of the given point to the next divided by the  
656 natural log of the overall total distance of the leaf. **C)** Mean leaf with coordinates colored by the

657 standard deviation of the residuals for each coordinate for the allometric relationship described  
658 in B. **D)** Mean leaf with coordinates colored by  $-\log_{10}$  p-values (Benjamini-Hochberg multiple  
659 test adjusted) for a Kruskal-Wallis test for the Euclidean distances of each point to the mean  
660 leaf modeled by variety. Values failing to meet the adjusted significance value of  $p = 0.05$  are  
661 shown in gray. **E)** A plot of the distance of each coordinate to the petiolar junction divided by  
662 the midvein length versus the angle of each point from the midvein (the angle defined by the  
663 tip of the midvein, the petiolar junction, and the point of interest). The mean leaf defined by  
664 angle and distance coordinates is shown in blue. **F)** Three morphometric methods are  
665 compared: only landmarks (24 landmark values, orange), the Galet-inspired method (angle and  
666 distance transformation, teal), and all Procrustes points (the 5,999 landmarks + pseudo-  
667 landmarks, lavender). The overall accuracy of predicting variety using the indicated number of  
668 PCs for each method is plotted. The number of PCs that yielded the maximum accuracy  
669 ultimately used for prediction is shown (27 for only landmarks, 42 for Galet, and 54 for all  
670 Procrustes). **G)** The  $-\log_{10}$  value of the proportion of variance explained by each of the PCs for  
671 each of methods is shown. Again, the number of PCs used for prediction that yielded the  
672 maximum accuracy is indicated.

673  
674 **Figure 7: Predicting variety from shape.** Confusion matrices showing the accuracy of prediction  
675 for leaves by variety for the **A)** only landmark (24 landmark values), **B)** Galet-inspired (angle and  
676 distance transformation), and **C)** all Procrustes (5,999 landmarks + pseudo-landmarks) methods.  
677 For each confusion matrix, varieties are arranged by clustering based on overall morphological  
678 similarity in **Fig. 2**. Group I and II varieties with deeply and slightly lobing leaves (respectively)  
679 are separated by white lines. The number of leaves assigned, zero to four, is indicated by color  
680 (dark to light).



Variety: Zinfandel  
 Type: Wine grape

Image file: L1139A

Leaf number 1

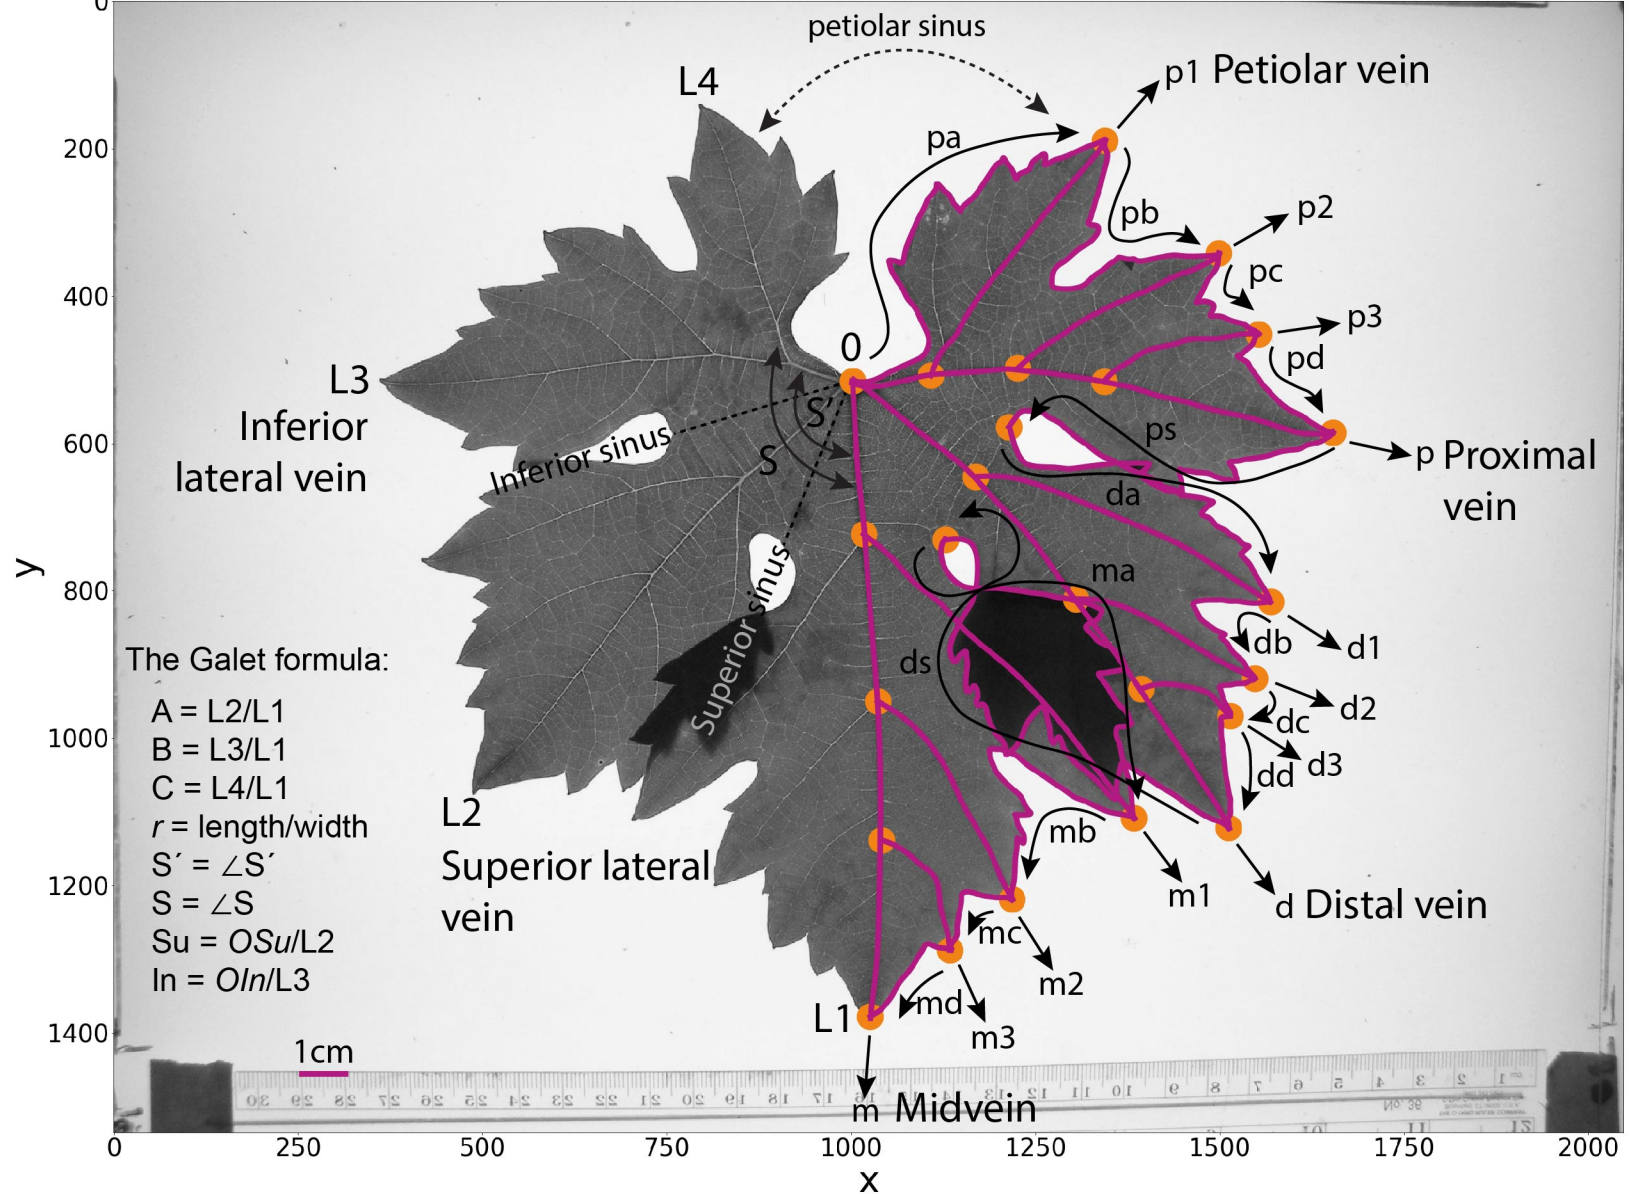

Figure 1: The Galet formula and Procrustean methods. A scan of a Zinfandel leaf over which raw data has been plotted. Data is saved as image pixel coordinates. On the right side of the leaf landmarks (orange dots) and pseudo-landmarks (magenta lines) are plotted. Landmark data are saved as vectors, the names of which are indicated next to corresponding arrows. "p", "d", and "m" refer to "proximal", "distal", and "midvein" regions of the leaf. Along the blade, the base of each arrow and its tip indicate the beginning and end of a vector. Arrows arising from the tips of veins indicate the direction of vein vectors that originate at corresponding branch points within the leaf and terminate at the tips. On the left side of the leaf, the nomenclature of Galet is provided. Midvein, distal/superior, proximal/inferior, and petiolar veins are called L1, L2, L3, and L4, respectively. Superior and inferior sinuses are shown, as well as angles  $S'$  and  $S$  between L1/L3 and L1/L4, respectively. A, B, and C are ratios of the lengths of L2, L3, and L4, respectively, to L1;  $r$  is the ratio of length to width; and  $Su$  and  $In$  are the distances to the petiolar junction (0) of the superior ( $Su$ ) and inferior ( $In$ ) sinuses divided by the length of the L2 and L3, respectively.

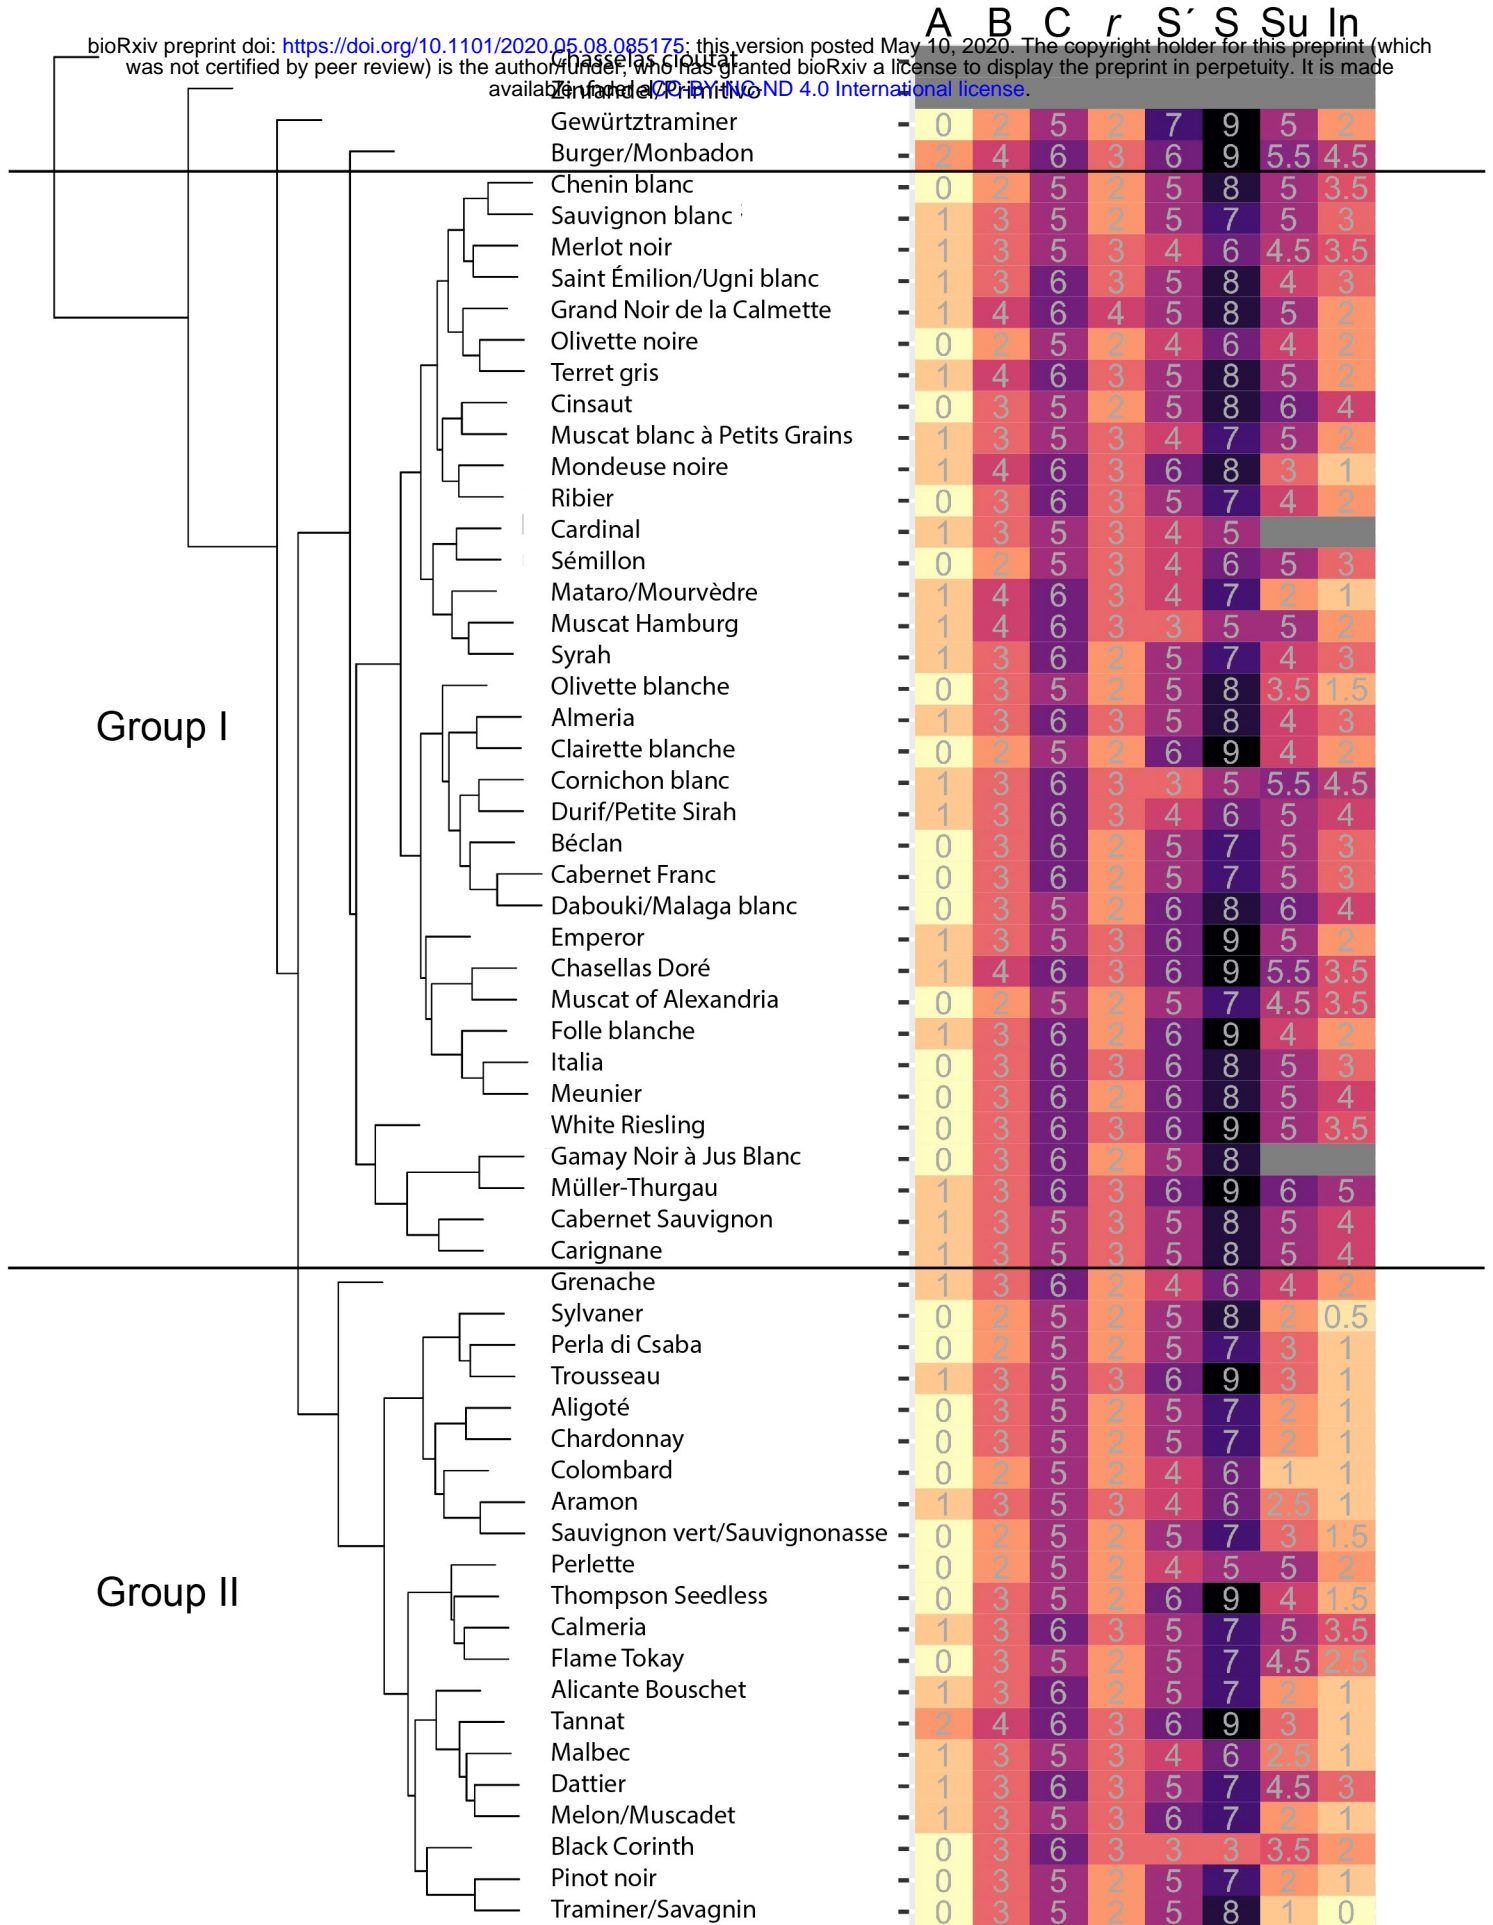

Figure 2: Clustering based on Procrustes distances and a comparison to Galet formula values. Hierarchical clustering based on a pairwise Procrustes distance matrix of the overall morphological similarity of averaged leaves for each variety is shown on the left. On the right, Galet formula values (colored from light to dark for low to high values) for A, B, C, r, S', S, Su, and In, as defined in Fig. 1, are shown. Two Groups (I and II) with deep and slight lobing, respectively, are indicated.

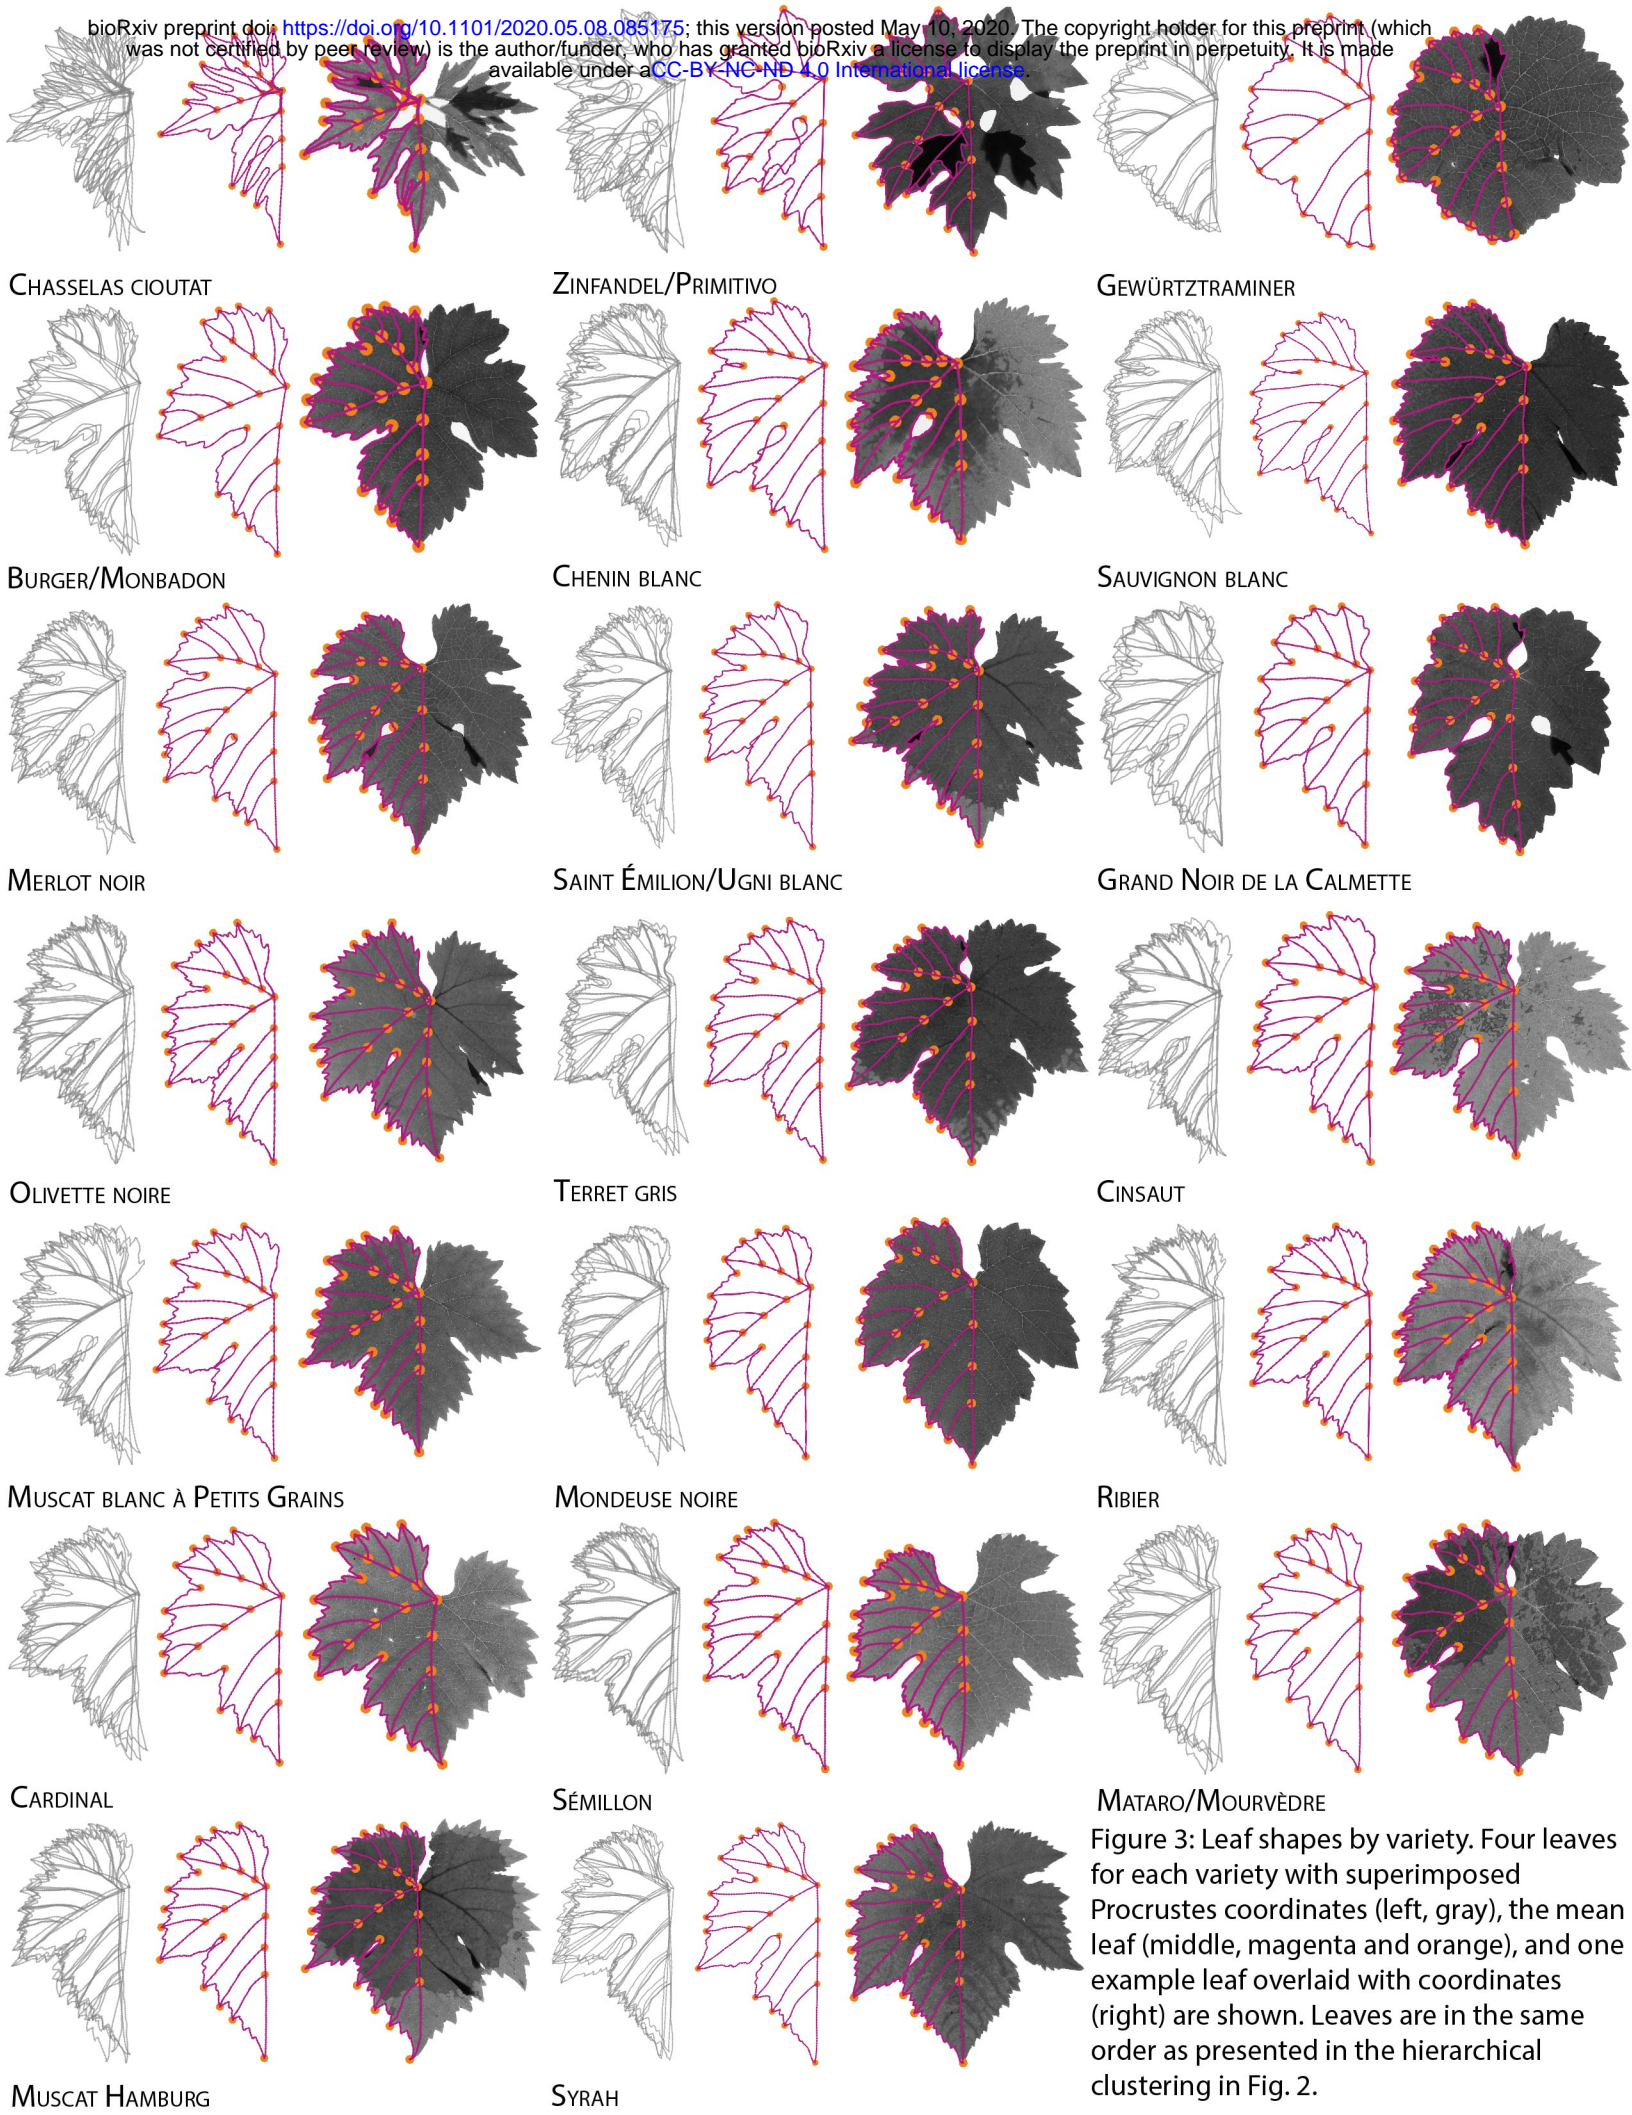

Figure 3: Leaf shapes by variety. Four leaves for each variety with superimposed Procrustes coordinates (left, gray), the mean leaf (middle, magenta and orange), and one example leaf overlaid with coordinates (right) are shown. Leaves are in the same order as presented in the hierarchical clustering in Fig. 2.

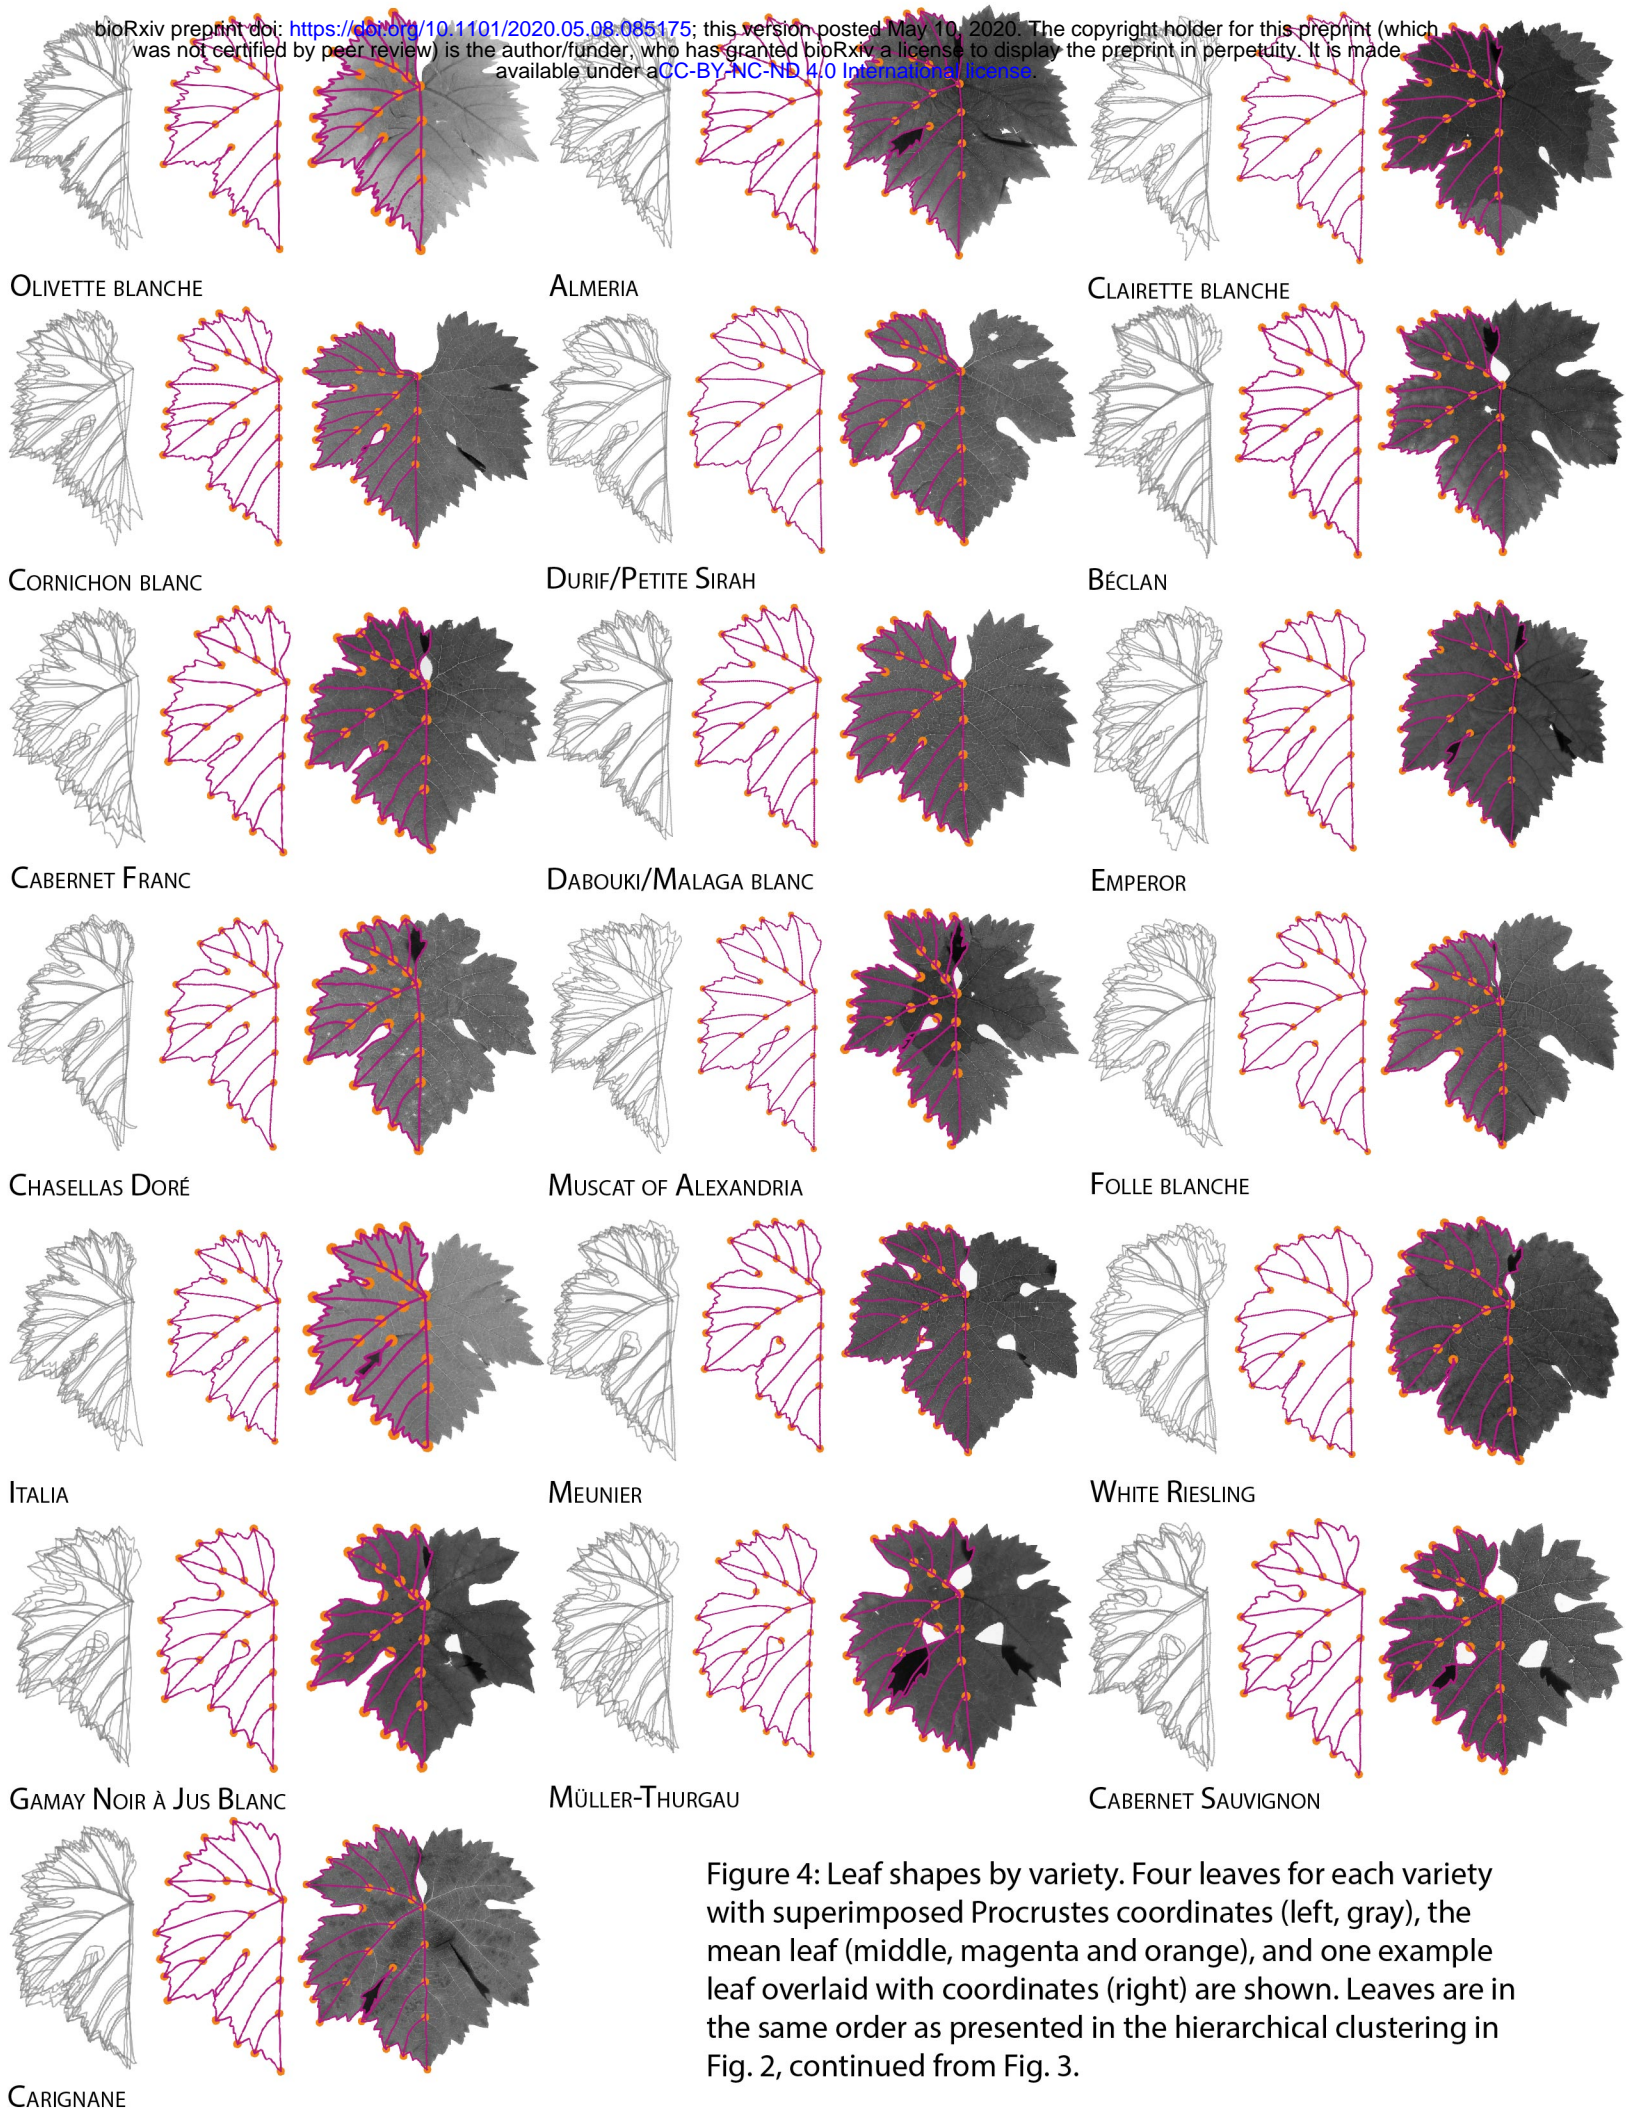

Figure 4: Leaf shapes by variety. Four leaves for each variety with superimposed Procrustes coordinates (left, gray), the mean leaf (middle, magenta and orange), and one example leaf overlaid with coordinates (right) are shown. Leaves are in the same order as presented in the hierarchical clustering in Fig. 2, continued from Fig. 3.

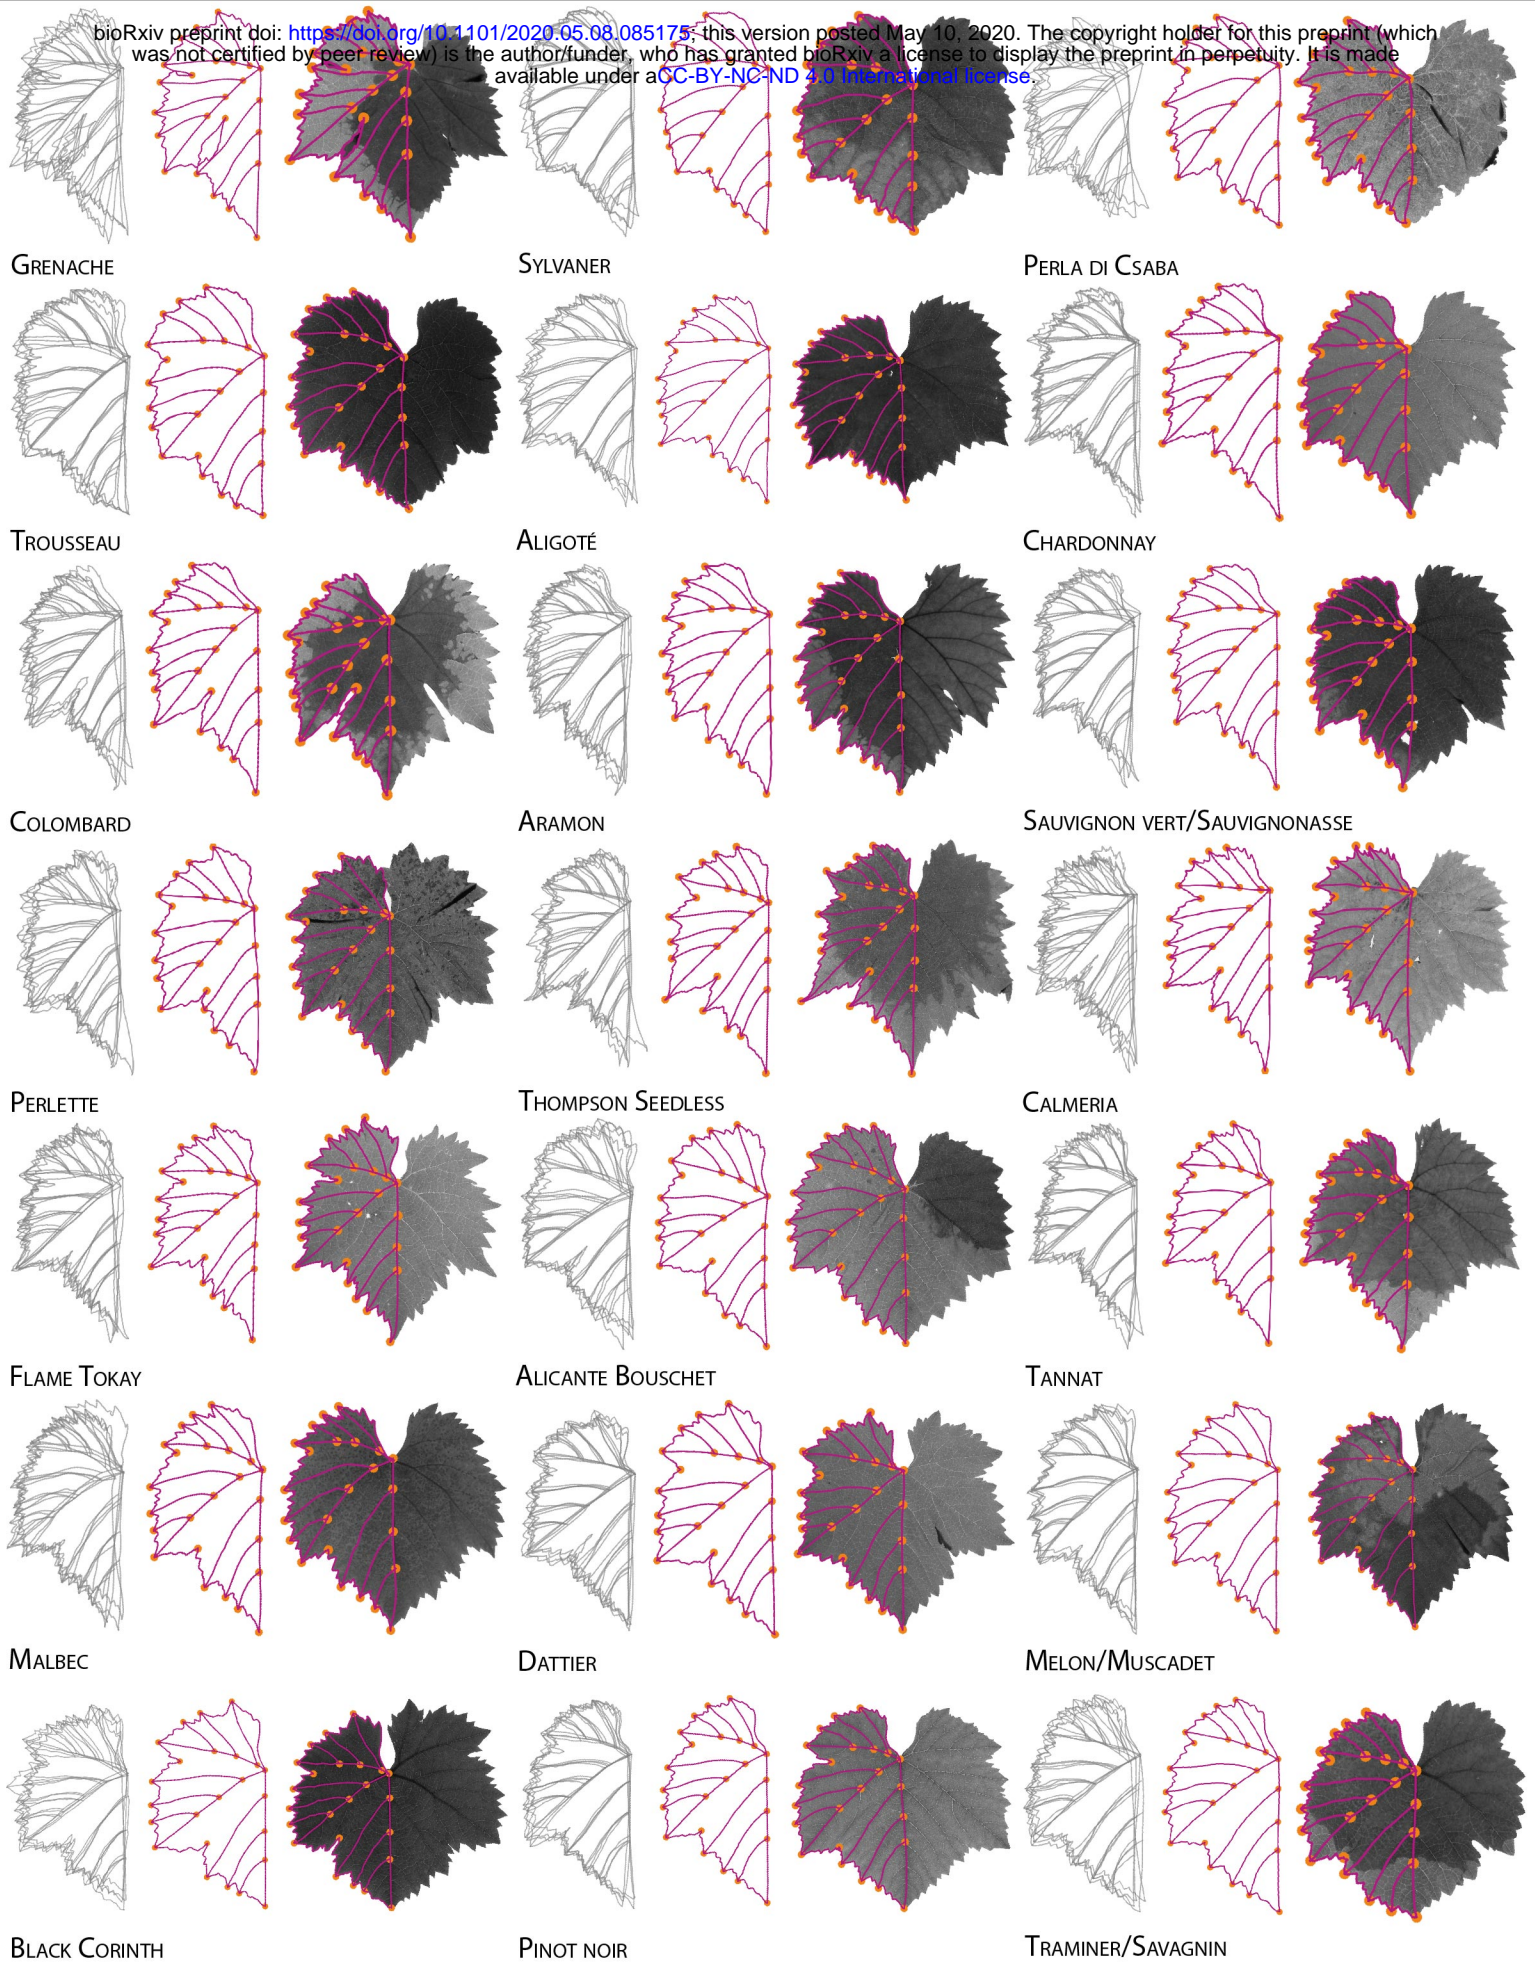

Figure 5: Leaf shapes by variety. Four leaves for each variety with superimposed Procrustes coordinates (left, gray), the mean leaf (middle, magenta and orange), and one example leaf overlaid with coordinates (right) are shown. Leaves are in the same order as presented in the hierarchical clustering in Fig. 2, continued from Fig. 4.

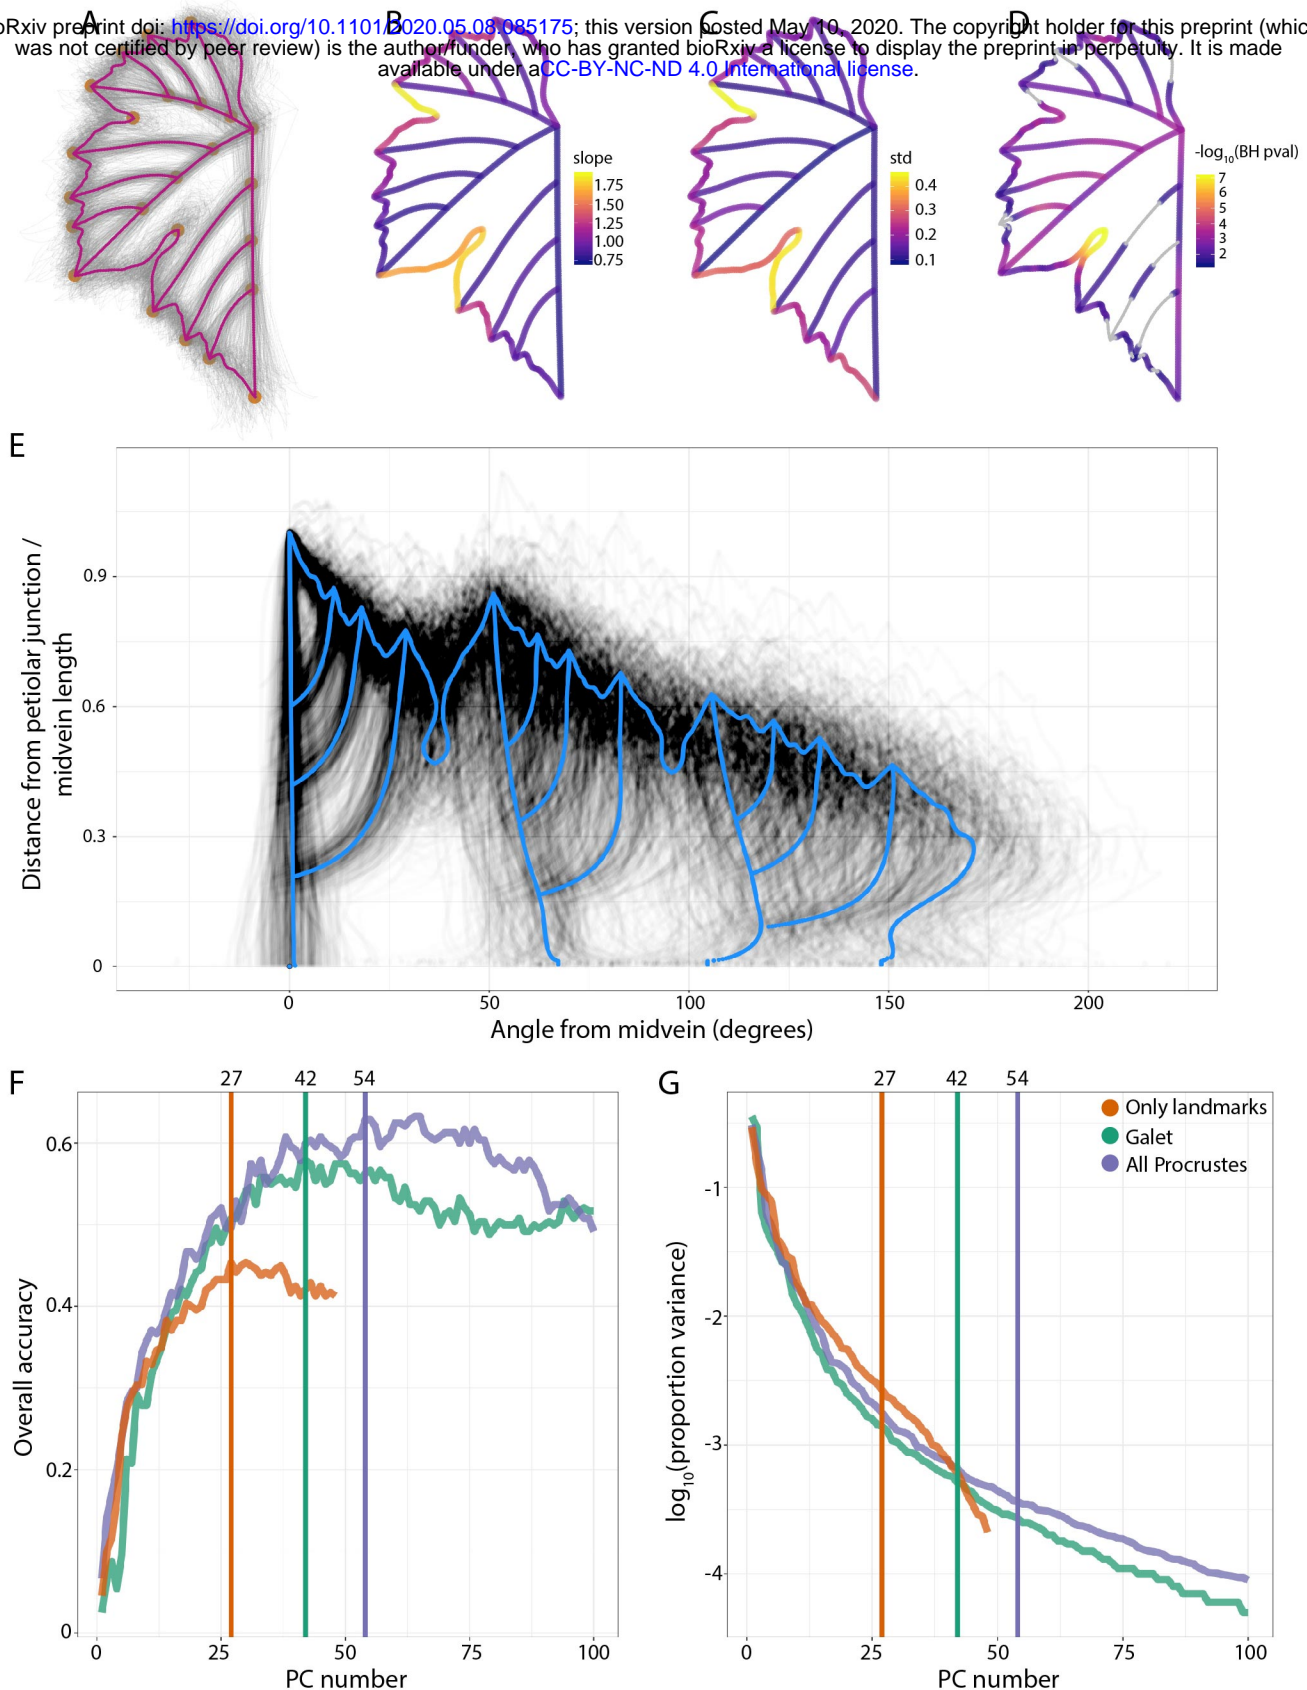

Figure 6: Allometry and variability between varieties and their prediction. A) Superimposed Procrustes coordinates for all leaves (gray) and overall mean leaf (magenta and orange). B) Allometric values for each coordinate projected onto the mean Procrustes leaf. Points are colored by slope of a fitted line for the natural log of the given point to the next divided by the natural log of the overall total distance of the leaf. C) Mean leaf with coordinates colored by the standard deviation of the residuals for the allometric relationship described in B. D) Mean leaf with coordinates colored by  $-\log_{10}$  p-values (Benjamini-Hochberg multiple test adjusted) for the Euclidean distances of each point to the mean leaf modeled by variety. Values failing to meet the adjusted significance value of  $p = 0.05$  are shown in gray. E) A plot of the distance of each coordinate to the petiolar junction divided by the midvein length versus the angle of each point from the midvein (the angle defined by the tip of the midvein, the petiolar junction, and the point of interest). The mean leaf defined by angle and distance coordinates is shown in blue. F) Three morphometric methods are compared: only landmarks (24 landmark values, orange), the Galet-inspired method (angle and distance transformation, teal), and all Procrustes points (the 5,999 landmarks + pseudo-landmarks, lavender). The overall accuracy of predicting variety using the indicated number of PCs for each method is plotted. The number of PCs that yielded the maximum accuracy ultimately used for prediction is shown (27 for only landmarks, 42 for Galet, and 54 for all Procrustes). G) The  $-\log_{10}$  value of the proportion of variance explained by each of the PCs for each of methods is shown. Again, the number of PCs used for prediction that yielded the maximum accuracy is indicated.

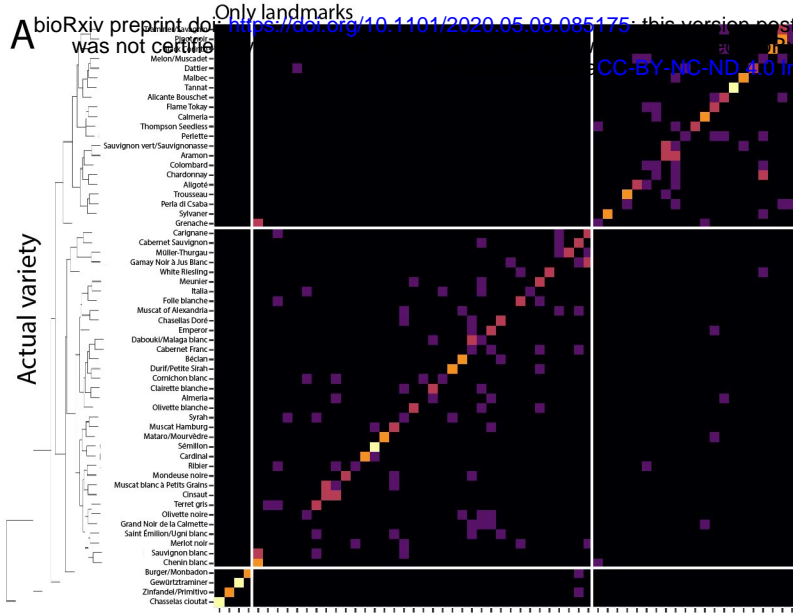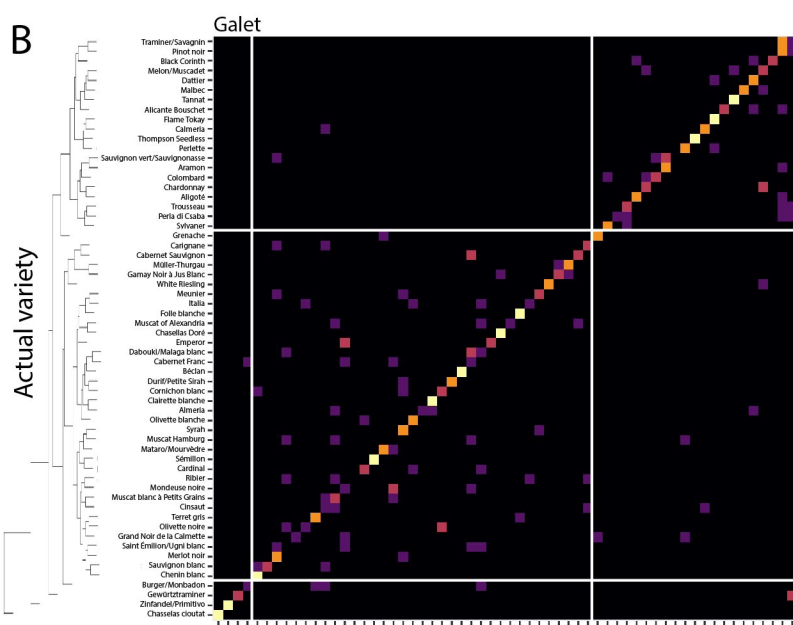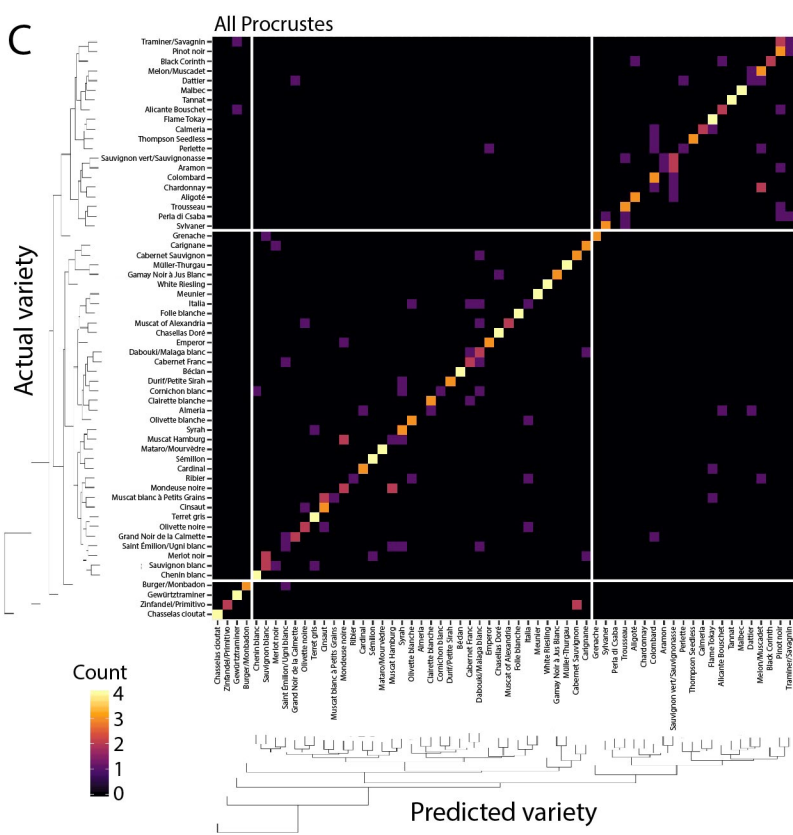

Figure 7: Predicting variety from shape. Confusion matrices showing the accuracy of prediction for leaves by variety for the A) only landmark (24 landmark values), B) Galet-inspired (angle and distance transformation), and C) all Procrustes (5,999 landmarks + pseudo-landmarks) methods. For each confusion matrix, varieties are arranged by clustering based on overall morphological similarity in Fig. 2. Group I and II varieties with deeply and slightly lobing leaves (respectively) are separated by white lines. The number of leaves assigned, zero to four, is indicated by color (dark to light).
